# Supplementary material for: Feasibility, Effectiveness and Safety of Elastomeric Pumps for Delivery of Antibiotics to Adult Hospital Inpatients—A Systematic Review
Source: MDPI journal article supplement (doi:10.3390/antibiotics12091351), 2023-08-22
Supplement: s1 [file s1]

# Supplementary materials

Table S1 – AMED search strategy and results

17<sup>th</sup> December 2022

|    | Search terms                                                                                                                                                                                                                               | Hits |
|----|--------------------------------------------------------------------------------------------------------------------------------------------------------------------------------------------------------------------------------------------|------|
| 1  | Elastomeric pump*.mp.                                                                                                                                                                                                                      | 2    |
| 2  | Balloon pump*.mp.                                                                                                                                                                                                                          | 2    |
| 3  | Ball pump*.mp. [mp=abstract, heading words, title]                                                                                                                                                                                         | 0    |
| 4  | Portable pump*.mp.                                                                                                                                                                                                                         | 0    |
| 5  | Accufuser*.mp. [mp=abstract, heading words, title]                                                                                                                                                                                         | 0    |
| 6  | Lv10*.mp. [mp=abstract, heading words, title]                                                                                                                                                                                              | 0    |
| 7  | Intimate*.mp.                                                                                                                                                                                                                              | 281  |
| 8  | Infusor*.mp.                                                                                                                                                                                                                               | 2    |
| 9  | 1 or 2 or 3 or 4 or 5 or 6 or 7 or 8                                                                                                                                                                                                       | 287  |
| 10 | Antiinfective agent*.mp.                                                                                                                                                                                                                   | 1051 |
| 11 | Exp antiinfective agents/                                                                                                                                                                                                                  | 4963 |
| 12 | Infectious agent*.mp.                                                                                                                                                                                                                      | 28   |
| 13 | Exp antibacterial agents/                                                                                                                                                                                                                  | 1766 |
| 14 | Exp antifungal agents/                                                                                                                                                                                                                     | 690  |
| 15 | Exp antiviral agents/                                                                                                                                                                                                                      | 754  |
| 16 | 10 or 11 or 12 or 13 or 14 or 15                                                                                                                                                                                                           | 4985 |
| 17 | (amikacin* or amoxicillin* or amoxycillin* or ampicillin* or azithromycin* or aztreonam* or bleomycin* or carbenicillin* or cefazolin* or cefepime*).mp. [mp=abstract, heading words, title]                                               | 164  |
| 18 | (cefiderocol* or cefmetazole* or cefonicid* or cefoperazone* or cefotaxime* or cefotetan* or cefoxitin* or ceftaroline* or ceftazidime* or ceftazidimeavibactam*).mp. [mp=abstract, heading words, title]                                  | 11   |
| 19 | (ceftazidime-avibactam* or ceftizoxime* or ceftolozanetazobactam* or ceftolozane-tazobactam* or ceftriaxone* or cefuroxime* or cephalothin* or cephalixin* or chloramphenicol* or ciprofloxacin*).mp. [mp=abstract, heading words, title]  | 99   |
| 20 | (clarithromycin* or clindamycin* or cloxacillin* or colistimethate* or dactinomycin* or daptomycin* or delafloxacin* or doripenem* or eravacycline* or ertapenem*).mp. [mp=abstract, heading words, title]                                 | 40   |
| 21 | (erythromycin* or flucloxacillin* or fosfomycin* or fusidic* or gentamicin* or imipenem* or imipenem-cilastatin-relebactam* or kanamycin* or lefamulin* or levofloxacin*).mp. [mp=abstract, heading words, title]                          | 111  |
| 22 | (lincomycin* or linezolid* or meropenem* or meropenemvaborbactam* or methicillin* or metronidazole* or mezlocillin* or mitomycin* or moxifloxacin* or nafcillin*).mp. [mp=abstract, heading words, title]                                  | 348  |
| 23 | (netilmicin* or oritavancin* or oxacillin* or oxytetracycline* or penicillin* or piperacillin* or piperacillin-tazobactam* or piperacillintazobactam* or plazomicin* or plicamycin* or polymyxin*).mp. [mp=abstract, heading words, title] | 101  |
| 24 | (quinupristin-dalfopristin* or sulfamethoxazole* or sulfisoxazole* or teicoplanin* or telavancin* or temocillin* or ticarcillin* or tigecycline* or tobramycin* or trovafloxacin* or vancomycin*).mp. [mp=abstract, heading words, title]  | 84   |
| 25 | (aciclovir* or acyclovir* or amphotericin* or liposomal-amphotericin* or ambisome* or anidulafungin* or caspofungin* or eravacycline* or famciclovir* or fluconazole*).mp. [mp=abstract, heading words, title]                             | 153  |

|    |                                                                                                                                                                                       |      |
|----|---------------------------------------------------------------------------------------------------------------------------------------------------------------------------------------|------|
| 26 | (flucytosine* or foscarnet* or ganciclovir* or isavuconazonium* or isoconazole* or micafungin* or pentamidine* or rifampin* or voriconazole*).mp. [mp=abstract, heading words, title] | 36   |
| 27 | 17 or 18 or 19 or 20 or 21 or 22 or 23 or 24 or 25 or 26                                                                                                                              | 947  |
| 28 | 16 or 27                                                                                                                                                                              | 5438 |
| 29 | Intravenous*.mp.                                                                                                                                                                      | 933  |
| 30 | Exp drug administration routes/                                                                                                                                                       | 1380 |
| 31 | Parenteral*.mp.                                                                                                                                                                       | 241  |
| 32 | 29 or 30 or 31                                                                                                                                                                        | 2442 |
| 33 | 28 and 32                                                                                                                                                                             | 73   |
| 34 | Limit 33 to" yr =2021-2022"                                                                                                                                                           | 1    |

Table S2 – CINHAL search strategy and results

31<sup>st</sup> December 22

|    | Search Terms                                                                                                                                                                                    | Hits    |
|----|-------------------------------------------------------------------------------------------------------------------------------------------------------------------------------------------------|---------|
| 1  | (mh "infusion pumps+")                                                                                                                                                                          | 6,418   |
| 2  | (mh "elastomers+")                                                                                                                                                                              | 3,323   |
| 3  | S1 or s2                                                                                                                                                                                        | 9,716   |
| 4  | Elastomeric pump*                                                                                                                                                                               | 85      |
| 5  | Balloon pump*                                                                                                                                                                                   | 1,554   |
| 6  | Ball pump*                                                                                                                                                                                      | 0       |
| 7  | Portable pump*                                                                                                                                                                                  | 54      |
| 8  | Acufuser*                                                                                                                                                                                       | 3       |
| 9  | Lv10*                                                                                                                                                                                           | 5       |
| 10 | Intimate*                                                                                                                                                                                       | 21,178  |
| 11 | Infusor*                                                                                                                                                                                        | 1,223   |
| 12 | Mh "drug delivery systems+")                                                                                                                                                                    | 10,412  |
| 13 | S4 or s5 or s6 or s7 or s8 or s9 or s10 or s11 or s12                                                                                                                                           | 34,401  |
| 14 | S3 or s13                                                                                                                                                                                       | 39,512  |
| 15 | (mh "antiinfective agents+")                                                                                                                                                                    | 181,256 |
| 16 | (mh "antibiotics, antifungal+")                                                                                                                                                                 | 2,125   |
| 17 | (mh "antifungal agents+")                                                                                                                                                                       | 9,917   |
| 18 | Amikacin* or amoxicillin* or amoxycillin* or ampicillin* or azithromycin* or aztreonam* or bleomycin* or carbenicillin* or cefazolin* or cefepime*                                              | 13,716  |
| 19 | Cefiderocol* or cefmetazole* or cefonicid* or cefoperazone* or cefotaxime* or cefotetan* or ceftazidime* or ceftazidimeavibactam*                                                               | 3,511   |
| 20 | Ceftazidime-avibactam* or ceftizoxime* or ceftolozanetazobactam* or ceftolozane-tazobactam* or ceftriaxone* or cefuroxime* or cephalothin* or cephapirin* or chloramphenicol* or ciprofloxacin* | 8,235   |
| 21 | Clarithromycin* or clindamycin* or cloxacillin* or colistimethate* or dactinomycin* or daptomycin* or delafloxacin* or doripenem* or eravacycline* or ertapenem*                                | 5,812   |
| 22 | Erythromycin* or flucloxacillin* or fosfomycin* or fusidic* or gentamicin* or imipenem* or imipenem-cilastatin-relebactam* or kanamycin* or lefamulin* or levofloxacin*                         | 8,624   |

|    |                                                                                                                                                                                                  |         |
|----|--------------------------------------------------------------------------------------------------------------------------------------------------------------------------------------------------|---------|
| 23 | Lincomycin* or linezolid* or meropenem* or meropenemvaborbactam* or methicillin* or metronidazole* or mezlocillin* or mitomycin* or moxifloxacin* or nafcillin*                                  | 20,481  |
| 24 | Netilmicin* or oritavancin* or oxacillin* or oxytetracycline* or penicillin* or piperacillin* or piperacillin-tazobactam* or piperacillintazobactam* or plazomicin* or plicamycin* or polymyxin* | 8,455   |
| 25 | Quinupristin-dalfopristin* or sulfamethoxazole* or sulfisoxazole* or teicoplanin* or telavancin* or temocillin* or ticarcillin* or tigecycline* or tobramycin* or trovafloxacin* or vancomycin*  | 11,751  |
| 26 | Aciclovir* or acyclovir* or amphotericin* or liposomal-amphotericin* or ambisome* or anidulafungin* or caspofungin* or eravacycline* or famciclovir* or fluconazole*                             | 7,091   |
| 27 | Flucytosine* or foscarnet* or ganciclovir* or isavuconazonium* or isoconazole* or micafungin* or pentamidine* or rifampin* or voriconazole*                                                      | 5,689   |
| 28 | S15 or s16 or s17 or s18 or s19 or s20 or s21 or s22 or s23 or s24 or s25 or s26 or s27                                                                                                          | 200,970 |
| 29 | S14 and s28                                                                                                                                                                                      | 1,580   |
| 30 | (mh "infusions, intravenous")                                                                                                                                                                    | 11,721  |
| 31 | (mh "intravenous therapy+")                                                                                                                                                                      | 13,577  |
| 32 | (mh "infusions, parenteral+")                                                                                                                                                                    | 16,463  |
| 33 | Infusion* or intravenous* or parenteral*                                                                                                                                                         | 132,114 |
| 34 | S30 or s31 or s32 or s33                                                                                                                                                                         | 133,487 |
| 35 | S29 and s34                                                                                                                                                                                      | 310     |
| 36 | S29 and s34 limiters – published date 2021010 - 20221231                                                                                                                                         | 19      |

Table S3 – Cochrane library search strategy and results 5<sup>th</sup> February 2023

|   | Search Terms                                                                                                                                                                                                                                                                                                                                                                                                                                                                                                                                                                                                                                                                                                                                                                                                                                                                                                                                                                                                                                                                                                                                                                                                                                                                                                                                                                                                            | Hits  |
|---|-------------------------------------------------------------------------------------------------------------------------------------------------------------------------------------------------------------------------------------------------------------------------------------------------------------------------------------------------------------------------------------------------------------------------------------------------------------------------------------------------------------------------------------------------------------------------------------------------------------------------------------------------------------------------------------------------------------------------------------------------------------------------------------------------------------------------------------------------------------------------------------------------------------------------------------------------------------------------------------------------------------------------------------------------------------------------------------------------------------------------------------------------------------------------------------------------------------------------------------------------------------------------------------------------------------------------------------------------------------------------------------------------------------------------|-------|
| 1 | Elastomer* Elastomeric pump* or balloon pump* or ball pump* or portable pump* or accufuser* or lv10* or intimate* or infusor* in all text                                                                                                                                                                                                                                                                                                                                                                                                                                                                                                                                                                                                                                                                                                                                                                                                                                                                                                                                                                                                                                                                                                                                                                                                                                                                               | 3063  |
| 2 | Antiinfective agent* or anti-infective* or infectious agent* or antibiotic* or antifungal agent* or antiviral agent* or amikacin* or amoxicillin* or amoxycillin* or ampicillin* or azithromycin* or aztreonam* or bleomycin* or carbenicillin* or cefazolin* or cefepimecefiderocol* or cefmetazole* or cefonicid* or cefoperazone* or cefotaxime* or cefotetan* or cefoxitin* or ceftaroline* or ceftazidime* or ceftazidimeavibactam* ceftazidime-avibactam* or ceftizoxime* or ceftolozanetazobactam* or ceftolozane-tazobactam* or ceftriaxone* or cefuroxime* or cephalothin* or cephalixin* or chloramphenicol* or ciprofloxacin* clarithromycin* or clindamycin* or cloxacillin* or colistimethate* or dactinomycin* or daptomycin* or delafloxacin* or doripenem* or eravacycline* or ertapenem* erythromycin* or flucloxacillin* or fosfomycin* or fusidic* or gentamicin* or imipenem* or imipenem-cilastatin-relebactam* or kanamycin* or lefamulin* or levofloxacin* lincomycin* or linezolid* or meropenem* or meropenemvaborbactam* or methicillin* or metronidazole* or mezlocillin* or mitomycin* or moxifloxacin* or nafcillin* netilmicin* or oritavancin* or oxacillin* or oxytetracycline* or penicillin* or piperacillin* or piperacillin-tazobactam* or piperacillintazobactam* or plazomicin* or plicamycin* or polymyxin* quinupristin-dalfopristin* or sulfamethoxazole* or sulfisoxazole* or | 55170 |

|   |                                                                                                                                                                                                                                                                                                                                                                                                                                                                                               |    |
|---|-----------------------------------------------------------------------------------------------------------------------------------------------------------------------------------------------------------------------------------------------------------------------------------------------------------------------------------------------------------------------------------------------------------------------------------------------------------------------------------------------|----|
|   | teicoplanin* or telavancin* or temocillin* or ticarcillin* or tigecycline* or tobramycin* or trovafloxacin* or vancomycin* aciclovir* or acyclovir* or amphotericin* or liposomal-amphotericin* or ambisome* or anidulafungin* or caspofungin* or eravacycline* or famciclovir* or fluconazole* flucytosine* or foscarnet* or ganciclovir* or isavuconazonium* or isoconazole* or micafungin* or pentamidine* or rifampin* or voriconazole* in all text- (word variations have been searched) |    |
| 3 | 1 and 2                                                                                                                                                                                                                                                                                                                                                                                                                                                                                       | 58 |
| 4 | 3 Limited to 2021 – 2022                                                                                                                                                                                                                                                                                                                                                                                                                                                                      | 10 |

Table S4 – EMBASE search strategy and results 17<sup>th</sup> December 2022

|    | Search terms                                                                                                                                                                                                                                                                                                                                                 | Hits    |
|----|--------------------------------------------------------------------------------------------------------------------------------------------------------------------------------------------------------------------------------------------------------------------------------------------------------------------------------------------------------------|---------|
| 1  | Exp elastomeric infusion pump/                                                                                                                                                                                                                                                                                                                               | 128     |
| 2  | Exp elastomer/                                                                                                                                                                                                                                                                                                                                               | 5323    |
| 3  | Exp infusion pump/                                                                                                                                                                                                                                                                                                                                           | 12022   |
| 4  | Exp balloon pump/                                                                                                                                                                                                                                                                                                                                            | 8275    |
| 5  | Exp elastomeric pump/                                                                                                                                                                                                                                                                                                                                        | 128     |
| 6  | 1 or 2 or 3 or 4 or 5                                                                                                                                                                                                                                                                                                                                        | 25415   |
| 7  | Elastomeric pump*.mp.                                                                                                                                                                                                                                                                                                                                        | 416     |
| 8  | Balloon pump*.mp.                                                                                                                                                                                                                                                                                                                                            | 12633   |
| 9  | Ball pump*.mp.                                                                                                                                                                                                                                                                                                                                               | 2       |
| 10 | Portable pump*.mp.                                                                                                                                                                                                                                                                                                                                           | 447     |
| 11 | Accufuser*.mp.                                                                                                                                                                                                                                                                                                                                               | 56      |
| 12 | Lv10*.mp.                                                                                                                                                                                                                                                                                                                                                    | 62      |
| 13 | Intimate*.mp.                                                                                                                                                                                                                                                                                                                                                | 49000   |
| 14 | Infusor*.mp.                                                                                                                                                                                                                                                                                                                                                 | 1917    |
| 15 | Exp drug delivery system/                                                                                                                                                                                                                                                                                                                                    | 413092  |
| 16 | Exp drug delivery device/                                                                                                                                                                                                                                                                                                                                    | 117708  |
| 17 | 15 or 16                                                                                                                                                                                                                                                                                                                                                     | 413092  |
| 18 | 7 or 8 or 9 or 10 or 11 or 12 or 13 or 14                                                                                                                                                                                                                                                                                                                    | 64412   |
| 19 | 6 or 18                                                                                                                                                                                                                                                                                                                                                      | 81254   |
| 20 | 17 or 19                                                                                                                                                                                                                                                                                                                                                     | 480875  |
| 21 | Exp antiinfective agent/                                                                                                                                                                                                                                                                                                                                     | 4377489 |
| 22 | Exp anti-infective therapy/                                                                                                                                                                                                                                                                                                                                  | 278552  |
| 23 | Exp infectious agent/                                                                                                                                                                                                                                                                                                                                        | 34099   |
| 24 | Exp antibiotic therapy/                                                                                                                                                                                                                                                                                                                                      | 147871  |
| 25 | Exp antifungal agent/                                                                                                                                                                                                                                                                                                                                        | 417658  |
| 26 | Exp antiviral agent/                                                                                                                                                                                                                                                                                                                                         | 1366712 |
| 27 | 21 or 22 or 23 or 24 or 25 or 26                                                                                                                                                                                                                                                                                                                             | 4449170 |
| 28 | (amikacin* or amoxicillin* or amoxycillin* or ampicillin* or azithromycin* or aztreonam* or bleomycin* or carbenicillin* or cefazolin* or cefepime*).mp. [mp=title, abstract, heading word, drug trade name, original title, device manufacturer, drug manufacturer, device trade name, keyword heading word, floating subheading word, candidate term word] | 357840  |
| 29 | (cefiderocol* or cefmetazole* or cefonicid* or cefoperazone* or cefotaxime* or cefotetan* or cefoxitin* or ceftaroline* or ceftazidime* or ceftazidimeavibactam*).mp. [mp=title, abstract, heading word, drug trade name,                                                                                                                                    | 107362  |

|    |                                                                                                                                                                                                                                                                                                                                                                                                            |         |
|----|------------------------------------------------------------------------------------------------------------------------------------------------------------------------------------------------------------------------------------------------------------------------------------------------------------------------------------------------------------------------------------------------------------|---------|
|    | original title, device manufacturer, drug manufacturer, device trade name, keyword heading word, floating subheading word, candidate term word]                                                                                                                                                                                                                                                            |         |
| 30 | (ceftazidime-avibactam* or ceftizoxime* or ceftolozanetazobactam* or ceftolozane-tazobactam* or ceftriaxone* or cefuroxime* or cephalothin* or cephalixin* or chloramphenicol* or ciprofloxacin*).mp. [mp=title, abstract, heading word, drug trade name, original title, device manufacturer, drug manufacturer, device trade name, keyword heading word, floating subheading word, candidate term word]  | 255009  |
| 31 | (clarithromycin* or clindamycin* or cloxacillin* or colistimethate* or dactinomycin* or daptomycin* or delafloxacin* or doripenem* or eravacycline* or ertapenem*).mp. [mp=title, abstract, heading word, drug trade name, original title, device manufacturer, drug manufacturer, device trade name, keyword heading word, floating subheading word, candidate term word]                                 | 161637  |
| 32 | (erythromycin* or flucloxacillin* or fosfomycin* or fusidic* or gentamicin* or imipenem* or imipenem-cilastatin-relebactam* or kanamycin* or lefamulin* or levofloxacin*).mp. [mp=title, abstract, heading word, drug trade name, original title, device manufacturer, drug manufacturer, device trade name, keyword heading word, floating subheading word, candidate term word]                          | 282738  |
| 33 | (lincomycin* or linezolid* or meropenem* or meropenemvaborbactam* or methicillin* or metronidazole* or mezlocillin* or mitomycin* or moxifloxacin* or nafcillin*).mp. [mp=title, abstract, heading word, drug trade name, original title, device manufacturer, drug manufacturer, device trade name, keyword heading word, floating subheading word, candidate term word]                                  | 289090  |
| 34 | (netilmicin* or oritavancin* or oxacillin* or oxytetracycline* or penicillin* or piperacillin* or piperacillin-tazobactam* or piperacillintazobactam* or plazomicin* or plicamycin* or polymyxin*).mp. [mp=title, abstract, heading word, drug trade name, original title, device manufacturer, drug manufacturer, device trade name, keyword heading word, floating subheading word, candidate term word] | 246419  |
| 35 | (quinupristin-dalfopristin* or sulfamethoxazole* or sulfisoxazole* or teicoplanin* or telavancin* or temocillin* or ticarcillin* or tigecycline* or tobramycin* or trovafloxacin* or vancomycin*).mp. [mp=title, abstract, heading word, drug trade name, original title, device manufacturer, drug manufacturer, device trade name, keyword heading word, floating subheading word, candidate term word]  | 198612  |
| 36 | (aciclovir* or acyclovir* or amphotericin* or liposomal-amphotericin* or ambisome* or anidulafungin* or caspofungin* or eravacycline* or famciclovir* or fluconazole*).mp. [mp=title, abstract, heading word, drug trade name, original title, device manufacturer, drug manufacturer, device trade name, keyword heading word, floating subheading word, candidate term word]                             | 144975  |
| 37 | (flucytosine* or foscarnet* or ganciclovir* or isavuconazonium* or isoconazole* or micafungin* or pentamidine* or rifampin* or voriconazole*).mp. [mp=title, abstract, heading word, drug trade name, original title, device manufacturer, drug manufacturer, device trade name, keyword heading word, floating subheading word, candidate term word]                                                      | 90285   |
| 38 | 29 or 30 or 31 or 32 or 33 or 34 or 35 or 36 or 37                                                                                                                                                                                                                                                                                                                                                         | 976752  |
| 39 | 27 or 38                                                                                                                                                                                                                                                                                                                                                                                                   | 4541224 |
| 40 | Exp continuous infusion/                                                                                                                                                                                                                                                                                                                                                                                   | 49131   |
| 41 | Exp drug infusion/                                                                                                                                                                                                                                                                                                                                                                                         | 16515   |
| 42 | 20 and 39                                                                                                                                                                                                                                                                                                                                                                                                  | 104207  |
| 43 | Infusion*.mp.                                                                                                                                                                                                                                                                                                                                                                                              | 445933  |
| 44 | 40 or 41 or 43                                                                                                                                                                                                                                                                                                                                                                                             | 445933  |

|    |                                                                                                                                                                                                                                       |         |
|----|---------------------------------------------------------------------------------------------------------------------------------------------------------------------------------------------------------------------------------------|---------|
| 45 | 42 and 44                                                                                                                                                                                                                             | 3887    |
| 46 | Exp intravenous drug administration/                                                                                                                                                                                                  | 372388  |
| 47 | Exp parenteral drug administration/                                                                                                                                                                                                   | 760458  |
| 48 | (parenteral* or intravenous*).mp. [mp=title, abstract, heading word, drug trade name, original title, device manufacturer, drug manufacturer, device trade name, keyword heading word, floating subheading word, candidate term word] | 1339501 |
| 49 | 46 or 47 or 48                                                                                                                                                                                                                        | 1712002 |
| 50 | 45 and 49                                                                                                                                                                                                                             | 2116    |
| 51 | Limit 50 to "yr 2021- current"                                                                                                                                                                                                        | 286     |

Table S5 – OVID MEDLINE search strategy and results 17<sup>th</sup> November 2021

|    | Search Terms                                                                                                                                                                                                                                                                                                                                                                                                                                               | Hits    |
|----|------------------------------------------------------------------------------------------------------------------------------------------------------------------------------------------------------------------------------------------------------------------------------------------------------------------------------------------------------------------------------------------------------------------------------------------------------------|---------|
| 1  | Exp infusion pumps/                                                                                                                                                                                                                                                                                                                                                                                                                                        | 15225   |
| 2  | Exp elastomers/                                                                                                                                                                                                                                                                                                                                                                                                                                            | 37850   |
| 3  | 1 or 2                                                                                                                                                                                                                                                                                                                                                                                                                                                     | 52957   |
| 4  | Elastomeric pump*.mp.                                                                                                                                                                                                                                                                                                                                                                                                                                      | 211     |
| 5  | Balloon pump*.mp.                                                                                                                                                                                                                                                                                                                                                                                                                                          | 7354    |
| 6  | Ball pump*.mp.                                                                                                                                                                                                                                                                                                                                                                                                                                             | 3       |
| 7  | Portable pump*.mp.                                                                                                                                                                                                                                                                                                                                                                                                                                         | 332     |
| 8  | Accufuser*.mp.                                                                                                                                                                                                                                                                                                                                                                                                                                             | 5       |
| 9  | Lv10*.mp.                                                                                                                                                                                                                                                                                                                                                                                                                                                  | 25      |
| 10 | Intimate*.mp.                                                                                                                                                                                                                                                                                                                                                                                                                                              | 43460   |
| 11 | Infusor*.mp.                                                                                                                                                                                                                                                                                                                                                                                                                                               | 501     |
| 12 | Exp drug delivery systems/                                                                                                                                                                                                                                                                                                                                                                                                                                 | 167637  |
| 13 | 4 or 5 or 6 or 7 or 8 or 9 or 10 or 11 or 12                                                                                                                                                                                                                                                                                                                                                                                                               | 219274  |
| 14 | 3 or 13                                                                                                                                                                                                                                                                                                                                                                                                                                                    | 264527  |
| 15 | Exp anti-infective agents/                                                                                                                                                                                                                                                                                                                                                                                                                                 | 1796567 |
| 16 | Exp anti-bacterial agents/                                                                                                                                                                                                                                                                                                                                                                                                                                 | 805443  |
| 17 | Exp antifungal agents/                                                                                                                                                                                                                                                                                                                                                                                                                                     | 184427  |
| 18 | 15 or 16 or 17                                                                                                                                                                                                                                                                                                                                                                                                                                             | 1796567 |
| 19 | (amikacin* or amoxicillin* or amoxycillin* or ampicillin* or azithromycin* or aztreonam* or bleomycin* or carbenicillin* or cefazolin* or cefepime*).mp. [mp=title, abstract, original title, name of substance word, subject heading word, floating sub-heading word, keyword heading word, organism supplementary concept word, protocol supplementary concept word, rare disease supplementary concept word, unique identifier, synonyms]               | 108600  |
| 20 | (cefiderocol* or cefmetazole* or cefonicid* or cefoperazone* or cefotaxime* or cefotetan* or cefoxitin* or ceftaroline* or ceftazidime* or ceftazidimeavibactam*).mp. [mp=title, abstract, original title, name of substance word, subject heading word, floating sub-heading word, keyword heading word, organism supplementary concept word, protocol supplementary concept word, rare disease supplementary concept word, unique identifier, synonyms]  | 29318   |
| 21 | (clarithromycin* or clindamycin* or cloxacillin* or colistimethate* or dactinomycin* or daptomycin* or delafloxacin* or doripenem* or eravacycline* or ertapenem*).mp. [mp=title, abstract, original title, name of substance word, subject heading word, floating sub-heading word, keyword heading word, organism supplementary concept word, protocol supplementary concept word, rare disease supplementary concept word, unique identifier, synonyms] | 54341   |

|    |                                                                                                                                                                                                                                                                                                                                                                                                                                                                                            |         |
|----|--------------------------------------------------------------------------------------------------------------------------------------------------------------------------------------------------------------------------------------------------------------------------------------------------------------------------------------------------------------------------------------------------------------------------------------------------------------------------------------------|---------|
| 22 | (erythromycin* or flucloxacillin* or fosfomycin* or fusidic* or gentamicin* or imipenem* or imipenem-cilastatin-relebactam* or kanamycin* or lefamulin* or levofloxacin*).mp. [mp=title, abstract, original title, name of substance word, subject heading word, floating sub-heading word, keyword heading word, organism supplementary concept word, protocol supplementary concept word, rare disease supplementary concept word, unique identifier, synonyms]                          | 95838   |
| 23 | (lincomycin* or linezolid* or meropenem* or meropenemvaborbactam* or methicillin* or metronidazole* or mezlocillin* or mitomycin* or moxifloxacin* or nafcillin*).mp. [mp=title, abstract, original title, name of substance word, subject heading word, floating sub-heading word, keyword heading word, organism supplementary concept word, protocol supplementary concept word, rare disease supplementary concept word, unique identifier, synonyms]                                  | 115820  |
| 24 | (netilmicin* or oritavancin* or oxacillin* or oxytetracycline* or penicillin* or piperacillin* or piperacillin-tazobactam* or piperacillintazobactam* or plazomicin* or plicamycin* or polymyxin*).mp. [mp=title, abstract, original title, name of substance word, subject heading word, floating sub-heading word, keyword heading word, organism supplementary concept word, protocol supplementary concept word, rare disease supplementary concept word, unique identifier, synonyms] | 121111  |
| 25 | (quinupristin-dalfopristin* or sulfamethoxazole* or sulfisoxazole* or teicoplanin* or telavancin* or temocillin* or ticarcillin* or tigecycline* or tobramycin* or trovafloxacin* or vancomycin*).mp. [mp=title, abstract, original title, name of substance word, subject heading word, floating sub-heading word, keyword heading word, organism supplementary concept word, protocol supplementary concept word, rare disease supplementary concept word, unique identifier, synonyms]  | 73785   |
| 26 | (aciclovir* or acyclovir* or amphotericin* or liposomal-amphotericin* or ambisome* or anidulafungin* or caspofungin* or eravacycline* or famciclovir* or fluconazole*).mp. [mp=title, abstract, original title, name of substance word, subject heading word, floating sub-heading word, keyword heading word, organism supplementary concept word, protocol supplementary concept word, rare disease supplementary concept word, unique identifier, synonyms]                             | 52861   |
| 27 | (flucytosine* or foscarnet* or ganciclovir* or isavuconazonium* or isoconazole* or micafungin* or pentamidine* or rifampin* or voriconazole*).mp. [mp=title, abstract, original title, name of substance word, subject heading word, floating sub-heading word, keyword heading word, organism supplementary concept word, protocol supplementary concept word, rare disease supplementary concept word, unique identifier, synonyms]                                                      | 50774   |
| 28 | 19 or 20 or 21 or 22 or 23 or 24 or 25 or 26 or 27                                                                                                                                                                                                                                                                                                                                                                                                                                         | 505350  |
| 29 | 18 or 28                                                                                                                                                                                                                                                                                                                                                                                                                                                                                   | 1937526 |
| 30 | 14 and 29                                                                                                                                                                                                                                                                                                                                                                                                                                                                                  | 26147   |
| 31 | Exp infusions, intravenous/                                                                                                                                                                                                                                                                                                                                                                                                                                                                | 56872   |
| 32 | Infusion*.mp.                                                                                                                                                                                                                                                                                                                                                                                                                                                                              | 316522  |
| 33 | Continuous infusion*.mp.                                                                                                                                                                                                                                                                                                                                                                                                                                                                   | 19793   |
| 34 | Exp infusions, parenteral/                                                                                                                                                                                                                                                                                                                                                                                                                                                                 | 95128   |
| 35 | Parenteral*.mp.                                                                                                                                                                                                                                                                                                                                                                                                                                                                            | 91905   |
| 36 | Exp administration, intravenous/                                                                                                                                                                                                                                                                                                                                                                                                                                                           | 148447  |
| 37 | 31 or 32 or 33 or 34 or 35 or 36                                                                                                                                                                                                                                                                                                                                                                                                                                                           | 457221  |
| 38 | 30 and 37                                                                                                                                                                                                                                                                                                                                                                                                                                                                                  | 1564    |
| 39 | Limit 38 to "yr 2021-2022"                                                                                                                                                                                                                                                                                                                                                                                                                                                                 | 43      |

Table S6 – Pubmed search strategy and results 31<sup>st</sup> December 2022

|   | Search Terms                                                                                                                                                                                                                                                                                                                                                                                                                                                                                                                                                                                                                                                                                                                                                                                                                                                                                                                                                                                                                                                                                                                                                                                                                                                                                                                                                                                                                                                                                                                                                                                                                                                                                                                                                                                                                                                                                                                                                                                                                                                                                                                                                                                                                                                                                                                                                                                                                                                                                                                                                                                                                                                                                                                                                                                                                                                                                                                                                                                                                                                                                                                                                                                                                                                                                                                                                                                                                                                                                                                                                                                                                                                                                                                                                                                                                                                                                                                                                                                                                                                                                                                                                                                                                                                                                                                                                                                                                                                                                                                                                                                                                                                                                                                                                                                                                                                                                                                                                                                                                                                                                              | Hits   |
|---|-----------------------------------------------------------------------------------------------------------------------------------------------------------------------------------------------------------------------------------------------------------------------------------------------------------------------------------------------------------------------------------------------------------------------------------------------------------------------------------------------------------------------------------------------------------------------------------------------------------------------------------------------------------------------------------------------------------------------------------------------------------------------------------------------------------------------------------------------------------------------------------------------------------------------------------------------------------------------------------------------------------------------------------------------------------------------------------------------------------------------------------------------------------------------------------------------------------------------------------------------------------------------------------------------------------------------------------------------------------------------------------------------------------------------------------------------------------------------------------------------------------------------------------------------------------------------------------------------------------------------------------------------------------------------------------------------------------------------------------------------------------------------------------------------------------------------------------------------------------------------------------------------------------------------------------------------------------------------------------------------------------------------------------------------------------------------------------------------------------------------------------------------------------------------------------------------------------------------------------------------------------------------------------------------------------------------------------------------------------------------------------------------------------------------------------------------------------------------------------------------------------------------------------------------------------------------------------------------------------------------------------------------------------------------------------------------------------------------------------------------------------------------------------------------------------------------------------------------------------------------------------------------------------------------------------------------------------------------------------------------------------------------------------------------------------------------------------------------------------------------------------------------------------------------------------------------------------------------------------------------------------------------------------------------------------------------------------------------------------------------------------------------------------------------------------------------------------------------------------------------------------------------------------------------------------------------------------------------------------------------------------------------------------------------------------------------------------------------------------------------------------------------------------------------------------------------------------------------------------------------------------------------------------------------------------------------------------------------------------------------------------------------------------------------------------------------------------------------------------------------------------------------------------------------------------------------------------------------------------------------------------------------------------------------------------------------------------------------------------------------------------------------------------------------------------------------------------------------------------------------------------------------------------------------------------------------------------------------------------------------------------------------------------------------------------------------------------------------------------------------------------------------------------------------------------------------------------------------------------------------------------------------------------------------------------------------------------------------------------------------------------------------------------------------------------------------------------------------------------|--------|
| 1 | elastomer[mesh terms]                                                                                                                                                                                                                                                                                                                                                                                                                                                                                                                                                                                                                                                                                                                                                                                                                                                                                                                                                                                                                                                                                                                                                                                                                                                                                                                                                                                                                                                                                                                                                                                                                                                                                                                                                                                                                                                                                                                                                                                                                                                                                                                                                                                                                                                                                                                                                                                                                                                                                                                                                                                                                                                                                                                                                                                                                                                                                                                                                                                                                                                                                                                                                                                                                                                                                                                                                                                                                                                                                                                                                                                                                                                                                                                                                                                                                                                                                                                                                                                                                                                                                                                                                                                                                                                                                                                                                                                                                                                                                                                                                                                                                                                                                                                                                                                                                                                                                                                                                                                                                                                                                     | 37841  |
| 2 | infusion pumps [mesh terms]                                                                                                                                                                                                                                                                                                                                                                                                                                                                                                                                                                                                                                                                                                                                                                                                                                                                                                                                                                                                                                                                                                                                                                                                                                                                                                                                                                                                                                                                                                                                                                                                                                                                                                                                                                                                                                                                                                                                                                                                                                                                                                                                                                                                                                                                                                                                                                                                                                                                                                                                                                                                                                                                                                                                                                                                                                                                                                                                                                                                                                                                                                                                                                                                                                                                                                                                                                                                                                                                                                                                                                                                                                                                                                                                                                                                                                                                                                                                                                                                                                                                                                                                                                                                                                                                                                                                                                                                                                                                                                                                                                                                                                                                                                                                                                                                                                                                                                                                                                                                                                                                               | 15216  |
| 3 | external infusion pump[mesh terms]                                                                                                                                                                                                                                                                                                                                                                                                                                                                                                                                                                                                                                                                                                                                                                                                                                                                                                                                                                                                                                                                                                                                                                                                                                                                                                                                                                                                                                                                                                                                                                                                                                                                                                                                                                                                                                                                                                                                                                                                                                                                                                                                                                                                                                                                                                                                                                                                                                                                                                                                                                                                                                                                                                                                                                                                                                                                                                                                                                                                                                                                                                                                                                                                                                                                                                                                                                                                                                                                                                                                                                                                                                                                                                                                                                                                                                                                                                                                                                                                                                                                                                                                                                                                                                                                                                                                                                                                                                                                                                                                                                                                                                                                                                                                                                                                                                                                                                                                                                                                                                                                        | 15216  |
| 4 | Elastomeric-pump* or balloon-pump* or ball-pump* or portable pump* or accufuser* or lv10*,most recent,, ""elastomeric pump*""[all fields] or ""balloon pump*""[all fields] or ""ball pump*""[all fields] or ((""portability""[all fields] or ""portable""[all fields] or ""portables""[all fields]) and ""pump*""[all fields]) or ""accufuser*""[all fields] or ""lv10*""[all fields]"                                                                                                                                                                                                                                                                                                                                                                                                                                                                                                                                                                                                                                                                                                                                                                                                                                                                                                                                                                                                                                                                                                                                                                                                                                                                                                                                                                                                                                                                                                                                                                                                                                                                                                                                                                                                                                                                                                                                                                                                                                                                                                                                                                                                                                                                                                                                                                                                                                                                                                                                                                                                                                                                                                                                                                                                                                                                                                                                                                                                                                                                                                                                                                                                                                                                                                                                                                                                                                                                                                                                                                                                                                                                                                                                                                                                                                                                                                                                                                                                                                                                                                                                                                                                                                                                                                                                                                                                                                                                                                                                                                                                                                                                                                                    | 9299   |
| 5 | drug delivery system[mesh terms]                                                                                                                                                                                                                                                                                                                                                                                                                                                                                                                                                                                                                                                                                                                                                                                                                                                                                                                                                                                                                                                                                                                                                                                                                                                                                                                                                                                                                                                                                                                                                                                                                                                                                                                                                                                                                                                                                                                                                                                                                                                                                                                                                                                                                                                                                                                                                                                                                                                                                                                                                                                                                                                                                                                                                                                                                                                                                                                                                                                                                                                                                                                                                                                                                                                                                                                                                                                                                                                                                                                                                                                                                                                                                                                                                                                                                                                                                                                                                                                                                                                                                                                                                                                                                                                                                                                                                                                                                                                                                                                                                                                                                                                                                                                                                                                                                                                                                                                                                                                                                                                                          | 165722 |
| 6 | (((((drug delivery system[mesh terms]) or (elastomeric-pump* or balloon-pump* or ball-pump* or portable pump* or accufuser* or lv10*)) or (external infusion pump[mesh terms])) or (infusion pump[mesh terms])) or (elastomer[mesh terms]),most recent,, ""drug delivery systems""[mesh terms] or ("elastomeric pump*""[all fields] or ""balloon pump*""[all fields] or ""ball pump*""[all fields] or ((""portability""[all fields] or ""portable""[all fields] or ""portables""[all fields]) and ""pump*""[all fields]) or ""accufuser*""[all fields] or ""lv10*""[all fields]) or ""infusion pumps""[mesh terms] or ""infusion pumps""[mesh terms] or ""elastomers""[mesh terms]"                                                                                                                                                                                                                                                                                                                                                                                                                                                                                                                                                                                                                                                                                                                                                                                                                                                                                                                                                                                                                                                                                                                                                                                                                                                                                                                                                                                                                                                                                                                                                                                                                                                                                                                                                                                                                                                                                                                                                                                                                                                                                                                                                                                                                                                                                                                                                                                                                                                                                                                                                                                                                                                                                                                                                                                                                                                                                                                                                                                                                                                                                                                                                                                                                                                                                                                                                                                                                                                                                                                                                                                                                                                                                                                                                                                                                                                                                                                                                                                                                                                                                                                                                                                                                                                                                                                                                                                                                       | 220034 |
| 7 | amikacin* or amoxicillin* or amoxycillin* or ampicillin* or azithromycin* or aztreonam* or bleomycin* or carbenicillin* or cefazolin* or cefepime* or cefiderocol* or cefmetazole* or cefonicid* or cefoperazone* or cefotaxime* or cefotetan* or ceftazidime* or ceftazidimeavibactam* or ceftazidime-avibactam* or ceftizoxime* or ceftolozanetazobactam* or ceftolozane-tazobactam* or ceftriaxone* or cefuroxime* or cephalothin* or cephapirin* or chloramphenicol* or ciprofloxacin* or clarithromycin* or clindamycin* or cloxacillin* or colistimethate* or dactinomycin* or daptomycin* or delafloxacin* or doripenem* or eravacycline* or ertapenem* or erythromycin* or flucloxacillin* or fosfomicin* or fusidic* or gentamicin* or imipenem* or imipenem-cilastatin-relebactam* or kanamycin* or lefamulin* or levofloxacin* or lincomycin* or linezolid* or meropenem* or meropenemvaborbactam* or methicillin* or metronidazole* or mezlocillin* or mitomycin* or moxifloxacin* or nafcillin* or netilmicin* or oritavancin* or oxacillin* or oxytetracycline* or penicillin* or piperacillin* or piperacillin-tazobactam* or piperacillintazobactam* or plazomicin* or plicamycin* or polymyxin* or quinupristin-dalfopristin* or sulfamethoxazole* or sulfisoxazole* or teicoplanin* or telavancin* or temocillin* or ticarcillin* or tigecycline* or tobramycin* or trovafloxacin* or vancomycin* or aciclovir* or acyclovir* or amphotericin* or liposomal-amphotericin* or ambisome* or anidulafungin* or caspofungin* or eravacycline* or famciclovir* or fluconazole* or flucytosine* or foscarnet* or ganciclovir* or isavuconazonium* or isoconazole* or micafungin* or pentamidine* or rifampin* or voriconazole*,most recent,, ""amikacin*""[all fields] or ""amoxicillin*""[all fields] or ""amoxycillin*""[all fields] or ""ampicillin*""[all fields] or ""azithromycin*""[all fields] or ""aztreonam*""[all fields] or ""bleomycin*""[all fields] or ""carbenicillin*""[all fields] or ""cefazolin*""[all fields] or ""cefepime*""[all fields] or ""cefiderocol*""[all fields] or ""cefmetazole*""[all fields] or ""cefonicid*""[all fields] or ""cefoperazone*""[all fields] or ""cefotaxime*""[all fields] or ""cefotetan*""[all fields] or ""ceftazidime*""[all fields] or ""ceftazidimeavibactam*""[all fields] or ""ceftizoxime*""[all fields] or ""ceftolozanetazobactam*""[all fields] or ""ceftolozane-tazobactam*""[all fields] or ""ceftriaxone*""[all fields] or ""cefuroxime*""[all fields] or ""cephalothin*""[all fields] or ""cephapirin*""[all fields] or ""chloramphenicol*""[all fields] or ""ciprofloxacin*""[all fields] or ""clarithromycin*""[all fields] or ""clindamycin*""[all fields] or ""cloxacillin*""[all fields] or ""colistimethate*""[all fields] or ""dactinomycin*""[all fields] or ""daptomycin*""[all fields] or ""delafloxacin*""[all fields] or ""doripenem*""[all fields] or ""eravacycline*""[all fields] or ""ertapenem*""[all fields] or ""erythromycin*""[all fields] or ""flucloxacillin*""[all fields] or ""fosfomicin*""[all fields] or ""fusidic*""[all fields] or ""gentamicin*""[all fields] or ""imipenem*""[all fields] or ""imipenem-cilastatin-relebactam*""[all fields] or ""kanamycin*""[all fields] or ""lefamulin*""[all fields] or ""levofloxacin*""[all fields] or ""lincomycin*""[all fields] or ""linezolid*""[all fields] or ""meropenem*""[all fields] or ""meropenemvaborbactam*""[all fields] or ""methicillin*""[all fields] or ""metronidazole*""[all fields] or ""mezlocillin*""[all fields] or ""mitomycin*""[all fields] or ""moxifloxacin*""[all fields] or ""nafcillin*""[all fields] or ""netilmicin*""[all fields] or ""oritavancin*""[all fields] or ""oxacillin*""[all fields] or ""oxytetracycline*""[all fields] or ""penicillin*""[all fields] or ""piperacillin*""[all fields] or ""piperacillin-tazobactam*""[all fields] or ""piperacillintazobactam*""[all fields] or ""plazomicin*""[all fields] or ""plicamycin*""[all fields] or ""polymyxin*""[all fields] or ""quinupristin-dalfopristin*""[all fields] or ""sulfamethoxazole*""[all fields] or ""sulfisoxazole*""[all fields] or ""teicoplanin*""[all fields] or ""telavancin*""[all fields] or ""temocillin*""[all fields] or ""ticarcillin*""[all fields] or ""tigecycline*""[all fields] or ""tobramycin*""[all fields] or ""trovafloxacin*""[all fields] or ""vancomycin*""[all fields] or ""aciclovir*""[all fields] or ""acyclovir*""[all fields] or ""amphotericin*""[all fields] or ""liposomal-amphotericin*""[all fields] or ""ambisome*""[all fields] or ""anidulafungin*""[all fields] or ""caspofungin*""[all fields] or ""eravacycline*""[all fields] or ""famciclovir*""[all fields] or ""fluconazole*""[all fields] or ""flucytosine*""[all fields] or ""foscarnet*""[all fields] or ""ganciclovir*""[all fields] or ""isavuconazonium*""[all fields] or ""isoconazole*""[all fields] or ""micafungin*""[all fields] or ""pentamidine*""[all fields] or ""rifampin*""[all fields] or ""voriconazole*""[all fields] | 552445 |



|    |                                                                                                                                                                                                                                                                                                                                                                                                                                                                                                                                                                                                                                                                                                                                                                                                                                                                                                                                                                                                                                                                                                                                                                                                                                                                                                                                                                                                                                                                                                                                                                                                                                                                                                                                                                                                                                                                                                                                                                                                                                                                                                                                                                                                                                                                                                                                                                                                                                                                                                                                                                                                                                                                                                                                                                                                                                                                                                                                                                                                                                    |         |
|----|------------------------------------------------------------------------------------------------------------------------------------------------------------------------------------------------------------------------------------------------------------------------------------------------------------------------------------------------------------------------------------------------------------------------------------------------------------------------------------------------------------------------------------------------------------------------------------------------------------------------------------------------------------------------------------------------------------------------------------------------------------------------------------------------------------------------------------------------------------------------------------------------------------------------------------------------------------------------------------------------------------------------------------------------------------------------------------------------------------------------------------------------------------------------------------------------------------------------------------------------------------------------------------------------------------------------------------------------------------------------------------------------------------------------------------------------------------------------------------------------------------------------------------------------------------------------------------------------------------------------------------------------------------------------------------------------------------------------------------------------------------------------------------------------------------------------------------------------------------------------------------------------------------------------------------------------------------------------------------------------------------------------------------------------------------------------------------------------------------------------------------------------------------------------------------------------------------------------------------------------------------------------------------------------------------------------------------------------------------------------------------------------------------------------------------------------------------------------------------------------------------------------------------------------------------------------------------------------------------------------------------------------------------------------------------------------------------------------------------------------------------------------------------------------------------------------------------------------------------------------------------------------------------------------------------------------------------------------------------------------------------------------------------|---------|
|    | <p>""ceftazidime*""[all fields] or ""ceftazidimeavibactam*""[all fields] or ""ceftazidime avibactam*""[all fields] or ""ceftizoxime*""[all fields] or</p> <p>""ceftolozanetazobactam*""[all fields] or ""ceftolozane tazobactam*""[all fields] or</p> <p>""ceftriaxone*""[all fields] or ""cefuroxime*""[all fields] or ""cephalothin*""[all fields] or ""cephapirin*""[all fields] or ""chloramphenicol*""[all fields] or</p> <p>""ciprofloxacin*""[all fields] or ""clarithromycin*""[all fields] or</p> <p>""clindamycin*""[all fields] or ""cloxacillin*""[all fields] or ""colistimethate*""[all fields] or ""dactinomycin*""[all fields] or ""daptomycin*""[all fields] or</p> <p>""delafloxacin*""[all fields] or ""doripenem*""[all fields] or ""eravacycline*""[all fields] or ""ertapenem*""[all fields] or ""erythromycin*""[all fields] or</p> <p>""flucloxacillin*""[all fields] or ""fosfomycin*""[all fields] or ""fusidic*""[all fields] or ""gentamicin*""[all fields] or ""imipenem*""[all fields] or ""imipenem cilastatin relebactam*""[all fields] or ""kanamycin*""[all fields] or ""lefamulin*""[all fields] or</p> <p>""levofloxacin*""[all fields] or ""lincomycin*""[all fields] or ""linezolid*""[all fields] or ""meropenem*""[all fields] or ""meropenemvaborbactam*""[all fields] or</p> <p>""methicillin*""[all fields] or ""metronidazole*""[all fields] or ""mezlocillin*""[all fields] or ""mitomycin*""[all fields] or ""moxifloxacin*""[all fields] or</p> <p>""nafcillin*""[all fields] or ""netilmicin*""[all fields] or ""oritavancin*""[all fields] or ""oxacillin*""[all fields] or ""oxytetracycline*""[all fields] or ""penicillin*""[all fields] or</p> <p>""piperacillin*""[all fields] or ""piperacillin tazobactam*""[all fields] or</p> <p>""piperacillintazobactam*""[all fields] or ""plazomicin*""[all fields] or</p> <p>""plicamycin*""[all fields] or ""polymyxin*""[all fields] or ""quinupristin dalfopristin*""[all fields] or ""sulfamethoxazole*""[all fields] or</p> <p>""sulfisoxazole*""[all fields] or ""teicoplanin*""[all fields] or ""telavancin*""[all fields] or ""temocillin*""[all fields] or ""ticarcillin*""[all fields] or ""tigecycline*""[all fields] or</p> <p>""tobramycin*""[all fields] or ""trovafloxacin*""[all fields] or</p> <p>""vancomycin*""[all fields] or ""acidovir*""[all fields] or ""acyclovir*""[all fields] or</p> <p>""amphotericin*""[all fields] or ""liposomal amphotericin*""[all fields] or</p> <p>""ambisome*""[all fields] or ""anidulafungin*""[all fields] or ""caspofungin*""[all fields] or ""eravacycline*""[all fields] or ""famciclovir*""[all fields] or</p> <p>""fluconazole*""[all fields] or ""flucytosine*""[all fields] or ""foscarnet*""[all fields] or</p> <p>""ganciclovir*""[all fields] or ""isavuconazonium*""[all fields] or</p> <p>""isoconazole*""[all fields] or ""micafungin*""[all fields] or ""pentamidine*""[all fields] or</p> <p>""rifampin*""[all fields] or ""voriconazole*""[all fields]”</p> |         |
| 8  | "agents, antiinfective [mesh terms]                                                                                                                                                                                                                                                                                                                                                                                                                                                                                                                                                                                                                                                                                                                                                                                                                                                                                                                                                                                                                                                                                                                                                                                                                                                                                                                                                                                                                                                                                                                                                                                                                                                                                                                                                                                                                                                                                                                                                                                                                                                                                                                                                                                                                                                                                                                                                                                                                                                                                                                                                                                                                                                                                                                                                                                                                                                                                                                                                                                                | 815313  |
| 9  | "anti-infective therapy" [mesh terms]                                                                                                                                                                                                                                                                                                                                                                                                                                                                                                                                                                                                                                                                                                                                                                                                                                                                                                                                                                                                                                                                                                                                                                                                                                                                                                                                                                                                                                                                                                                                                                                                                                                                                                                                                                                                                                                                                                                                                                                                                                                                                                                                                                                                                                                                                                                                                                                                                                                                                                                                                                                                                                                                                                                                                                                                                                                                                                                                                                                              | 403921  |
| 10 | <p>antibiotic* or anti-biotic* or anti-bacterial* or antibacterial* or antimicrobial* or anti-microbial* or anti-fungal* or anti-viral* or antiviral* or infectious agent*,most recent,, ""antibiotic*""[all fields] or ""anti biotic*""[all fields] or ""anti bacterial*""[all fields] or ""antibacterial*""[all fields] or ""antimicrobial*""[all fields] or ""anti microbial*""[all fields] or ""anti fungal*""[all fields] or ""anti viral*""[all fields] or ""antiviral*""[all fields] or ((""infectious""[all fields] or ""infectiousness""[all fields]) and ""agent*""[all fields])”</p>                                                                                                                                                                                                                                                                                                                                                                                                                                                                                                                                                                                                                                                                                                                                                                                                                                                                                                                                                                                                                                                                                                                                                                                                                                                                                                                                                                                                                                                                                                                                                                                                                                                                                                                                                                                                                                                                                                                                                                                                                                                                                                                                                                                                                                                                                                                                                                                                                                    | 1701309 |
| 11 | <p>((((amikacin* or amoxicillin* or amoxycillin* or ampicillin* or azithromycin* or aztreonam* or bleomycin* or carbenicillin* or cefazolin* or cefepime* or cefiderocol* or cefmetazole* or cefonicid* or cefoperazone* or cefotaxime* or cefotetan* or cefoxitin* or ceftaroline* or ceftazidime* or ceftazidimeavibactam* or ceftazidime-avibactam* or ceftizoxime* or ceftolozanetazobactam* or ceftolozane-tazobactam* or ceftriaxone* or cefuroxime* or cephalothin* or cephapirin* or chloramphenicol* or ciprofloxacin* or clarithromycin* or clindamycin* or cloxacillin* or colistimethate* or dactinomycin* or daptomycin* or delafloxacin* or</p>                                                                                                                                                                                                                                                                                                                                                                                                                                                                                                                                                                                                                                                                                                                                                                                                                                                                                                                                                                                                                                                                                                                                                                                                                                                                                                                                                                                                                                                                                                                                                                                                                                                                                                                                                                                                                                                                                                                                                                                                                                                                                                                                                                                                                                                                                                                                                                      | 2036769 |

|                                                                                                                                                                                                                                                                                                                                                                                                                                                                                                                                                                                                                                                                                                                                                                                                                                                                                                                                                                                                                                                                                                                                                                                                                                                                                                                                                                                                                                                                                                                                                                                                                                                                                                                                                                                                                                                                                                                                                                                                                                                                                                                                                                                                                                                                                                                                                                                                                                                                                                                                                                                                                                                                                                                                                                                                                                                                                                                                                                                                                                                                                                                                                                                                                                                                                                                                                                                                                                                                                                                                                                                                                                                                                                                                                                                                                                                                                                                                                                                                                                                                                                                                                                                                                                                                                              |  |
|----------------------------------------------------------------------------------------------------------------------------------------------------------------------------------------------------------------------------------------------------------------------------------------------------------------------------------------------------------------------------------------------------------------------------------------------------------------------------------------------------------------------------------------------------------------------------------------------------------------------------------------------------------------------------------------------------------------------------------------------------------------------------------------------------------------------------------------------------------------------------------------------------------------------------------------------------------------------------------------------------------------------------------------------------------------------------------------------------------------------------------------------------------------------------------------------------------------------------------------------------------------------------------------------------------------------------------------------------------------------------------------------------------------------------------------------------------------------------------------------------------------------------------------------------------------------------------------------------------------------------------------------------------------------------------------------------------------------------------------------------------------------------------------------------------------------------------------------------------------------------------------------------------------------------------------------------------------------------------------------------------------------------------------------------------------------------------------------------------------------------------------------------------------------------------------------------------------------------------------------------------------------------------------------------------------------------------------------------------------------------------------------------------------------------------------------------------------------------------------------------------------------------------------------------------------------------------------------------------------------------------------------------------------------------------------------------------------------------------------------------------------------------------------------------------------------------------------------------------------------------------------------------------------------------------------------------------------------------------------------------------------------------------------------------------------------------------------------------------------------------------------------------------------------------------------------------------------------------------------------------------------------------------------------------------------------------------------------------------------------------------------------------------------------------------------------------------------------------------------------------------------------------------------------------------------------------------------------------------------------------------------------------------------------------------------------------------------------------------------------------------------------------------------------------------------------------------------------------------------------------------------------------------------------------------------------------------------------------------------------------------------------------------------------------------------------------------------------------------------------------------------------------------------------------------------------------------------------------------------------------------------------------------------------|--|
| <p>doripenem* or eravacycline* or ertapenem* or erythromycin* or flucloxacillin* or fosfomycin* or fusidic* or gentamicin* or imipenem* or imipenem-cilastatin-relebactam* or kanamycin* or lefamulin* or levofloxacin* or lincomycin* or linezolid* or meropenem* or meropenemvaborbactam* or methicillin* or metronidazole* or mezlocillin* or mitomycin* or moxifloxacin* or nafcillin* or netilmicin* or oritavancin* or oxacillin* or oxytetracycline* or penicillin* or piperacillin* or piperacillin-tazobactam* or piperacillintazobactam* or plazomicin* or plicamycin* or polymyxin* or quinupristin-dalfopristin* or sulfamethoxazole* or sulfisoxazole* or teicoplanin* or telavancin* or temocillin* or ticarcillin* or tigecycline* or tobramycin* or trovafloxacin* or vancomycin* or aciclovir* or acyclovir* or amphotericin* or liposomal-amphotericin* or ambisome* or anidulafungin* or caspofungin* or eravacycline* or famciclovir* or fluconazole* or flucytosine* or foscarnet* or ganciclovir* or isavuconazonium* or isoconazole* or micafungin* or pentamidine* or rifampin* or voriconazole*) or (agents, anti-infective[mesh terms])) or (anti-infective therapy[mesh terms])) or (antibiotic* or anti-biotic* or anti-bacterial* or antibacterial* or antimicrobial* or anti-microbial* or anti-fungal* or anti-viral* or antiviral* or infectious agent*)",most recent,, ""amikacin*""[all fields] or ""amoxicillin*""[all fields] or ""amoxycillin*""[all fields] or ""ampicillin*""[all fields] or ""azithromycin*""[all fields] or ""aztreonam*""[all fields] or ""bleomycin*""[all fields] or ""carbenicillin*""[all fields] or ""cefazolin*""[all fields] or ""cefepime*""[all fields] or ""cefiderocol*""[all fields] or ""cefmetazole*""[all fields] or ""cefonicid*""[all fields] or ""cefoperazone*""[all fields] or ""cefotaxime*""[all fields] or ""cefotetan*""[all fields] or ""cefoxitin*""[all fields] or ""ceftaroline*""[all fields] or ""ceftazidime*""[all fields] or ""ceftazidimeavibactam*""[all fields] or ""ceftazidime avibactam*""[all fields] or ""ceftizoxime*""[all fields] or ""ceftolozanetazobactam*""[all fields] or ""ceftolozane tazobactam*""[all fields] or ""ceftriaxone*""[all fields] or ""cefuroxime*""[all fields] or ""cephalothin*""[all fields] or ""cephapirin*""[all fields] or ""chloramphenicol*""[all fields] or ""ciprofloxacin*""[all fields] or ""clarithromycin*""[all fields] or ""clindamycin*""[all fields] or ""cloxacillin*""[all fields] or ""colistimethate*""[all fields] or ""dactinomycin*""[all fields] or ""daptomycin*""[all fields] or ""delafloxacin*""[all fields] or ""doripenem*""[all fields] or ""eravacycline*""[all fields] or ""ertapenem*""[all fields] or ""erythromycin*""[all fields] or ""flucloxacillin*""[all fields] or ""fosfomycin*""[all fields] or ""fusidic*""[all fields] or ""gentamicin*""[all fields] or ""imipenem*""[all fields] or ""imipenem cilastatin relebactam*""[all fields] or ""kanamycin*""[all fields] or ""lefamulin*""[all fields] or ""levofloxacin*""[all fields] or ""lincomycin*""[all fields] or ""linezolid*""[all fields] or ""meropenem*""[all fields] or ""meropenemvaborbactam*""[all fields] or ""methicillin*""[all fields] or ""metronidazole*""[all fields] or ""mezlocillin*""[all fields] or ""mitomycin*""[all fields] or ""moxifloxacin*""[all fields] or ""nafcillin*""[all fields] or ""netilmicin*""[all fields] or ""oritavancin*""[all fields] or ""oxacillin*""[all fields] or ""oxytetracycline*""[all fields] or ""penicillin*""[all fields] or ""piperacillin*""[all fields] or ""piperacillin tazobactam*""[all fields] or ""piperacillintazobactam*""[all fields] or ""plazomicin*""[all fields] or ""plicamycin*""[all fields] or ""polymyxin*""[all fields] or ""quinupristin dalfopristin*""[all fields] or ""sulfamethoxazole*""[all fields] or ""sulfisoxazole*""[all fields] or ""teicoplanin*""[all fields] or ""telavancin*""[all fields] or ""temocillin*""[all fields] or ""ticarcillin*""[all fields] or ""tigecycline*""[all fields] or ""tobramycin*""[all fields] or ""trovafloxacin*""[all fields] or ""vancomycin*""[all fields] or ""aciclovir*""[all fields] or ""acyclovir*""[all fields] or</p> |  |
|----------------------------------------------------------------------------------------------------------------------------------------------------------------------------------------------------------------------------------------------------------------------------------------------------------------------------------------------------------------------------------------------------------------------------------------------------------------------------------------------------------------------------------------------------------------------------------------------------------------------------------------------------------------------------------------------------------------------------------------------------------------------------------------------------------------------------------------------------------------------------------------------------------------------------------------------------------------------------------------------------------------------------------------------------------------------------------------------------------------------------------------------------------------------------------------------------------------------------------------------------------------------------------------------------------------------------------------------------------------------------------------------------------------------------------------------------------------------------------------------------------------------------------------------------------------------------------------------------------------------------------------------------------------------------------------------------------------------------------------------------------------------------------------------------------------------------------------------------------------------------------------------------------------------------------------------------------------------------------------------------------------------------------------------------------------------------------------------------------------------------------------------------------------------------------------------------------------------------------------------------------------------------------------------------------------------------------------------------------------------------------------------------------------------------------------------------------------------------------------------------------------------------------------------------------------------------------------------------------------------------------------------------------------------------------------------------------------------------------------------------------------------------------------------------------------------------------------------------------------------------------------------------------------------------------------------------------------------------------------------------------------------------------------------------------------------------------------------------------------------------------------------------------------------------------------------------------------------------------------------------------------------------------------------------------------------------------------------------------------------------------------------------------------------------------------------------------------------------------------------------------------------------------------------------------------------------------------------------------------------------------------------------------------------------------------------------------------------------------------------------------------------------------------------------------------------------------------------------------------------------------------------------------------------------------------------------------------------------------------------------------------------------------------------------------------------------------------------------------------------------------------------------------------------------------------------------------------------------------------------------------------------------------------------|--|

|    |                                                                                                                                                                                                                                                                                                                                                                                                                                                                                                                                                                                                                                                                                                                                                                                                                                                                                                                                                                                                                                                                                                                                                                                                                                                                                                                                                                                                                                                                                                                                                                                                                                                                                                                                                                                                                                                                                                                                                                                                                                                                                                                                                                                                                                                                                                                                                                                                                                                                                                                                                                                                                                                                                                                                                                                                                                                                                                                                                                                                                                                                                                                                                                                                                                                                                                                                                                                                                                                                                                                                                                                                                                                                                                                                                                                                                                                                                                                                                                                                                                                                                                                                                                                                                                                                                                                                                                                                                                                                                                                                                                                                                                                                                                                                                                                                                                                                                                                                                                                                                                                                                                                                                                                                                                                                                                                                                                                                                                                                                                                                                                                                                                                                                                                                                                                                                                                                                                                                                                                                                                                                                                                                                                                                                                                                                                                                                                                                                                                                                                                                                                                                                                                                                                   |       |
|----|---------------------------------------------------------------------------------------------------------------------------------------------------------------------------------------------------------------------------------------------------------------------------------------------------------------------------------------------------------------------------------------------------------------------------------------------------------------------------------------------------------------------------------------------------------------------------------------------------------------------------------------------------------------------------------------------------------------------------------------------------------------------------------------------------------------------------------------------------------------------------------------------------------------------------------------------------------------------------------------------------------------------------------------------------------------------------------------------------------------------------------------------------------------------------------------------------------------------------------------------------------------------------------------------------------------------------------------------------------------------------------------------------------------------------------------------------------------------------------------------------------------------------------------------------------------------------------------------------------------------------------------------------------------------------------------------------------------------------------------------------------------------------------------------------------------------------------------------------------------------------------------------------------------------------------------------------------------------------------------------------------------------------------------------------------------------------------------------------------------------------------------------------------------------------------------------------------------------------------------------------------------------------------------------------------------------------------------------------------------------------------------------------------------------------------------------------------------------------------------------------------------------------------------------------------------------------------------------------------------------------------------------------------------------------------------------------------------------------------------------------------------------------------------------------------------------------------------------------------------------------------------------------------------------------------------------------------------------------------------------------------------------------------------------------------------------------------------------------------------------------------------------------------------------------------------------------------------------------------------------------------------------------------------------------------------------------------------------------------------------------------------------------------------------------------------------------------------------------------------------------------------------------------------------------------------------------------------------------------------------------------------------------------------------------------------------------------------------------------------------------------------------------------------------------------------------------------------------------------------------------------------------------------------------------------------------------------------------------------------------------------------------------------------------------------------------------------------------------------------------------------------------------------------------------------------------------------------------------------------------------------------------------------------------------------------------------------------------------------------------------------------------------------------------------------------------------------------------------------------------------------------------------------------------------------------------------------------------------------------------------------------------------------------------------------------------------------------------------------------------------------------------------------------------------------------------------------------------------------------------------------------------------------------------------------------------------------------------------------------------------------------------------------------------------------------------------------------------------------------------------------------------------------------------------------------------------------------------------------------------------------------------------------------------------------------------------------------------------------------------------------------------------------------------------------------------------------------------------------------------------------------------------------------------------------------------------------------------------------------------------------------------------------------------------------------------------------------------------------------------------------------------------------------------------------------------------------------------------------------------------------------------------------------------------------------------------------------------------------------------------------------------------------------------------------------------------------------------------------------------------------------------------------------------------------------------------------------------------------------------------------------------------------------------------------------------------------------------------------------------------------------------------------------------------------------------------------------------------------------------------------------------------------------------------------------------------------------------------------------------------------------------------------------------------------------------------|-------|
|    | <p>             ""amphotericin*""[all fields] or ""liposomal amphotericin*""[all fields] or<br/>             ""ambisome*""[all fields] or ""anidulafungin*""[all fields] or ""caspofungin*""[all<br/>             fields] or ""eravacycline*""[all fields] or ""famciclovir*""[all fields] or<br/>             ""fluconazole*""[all fields] or ""flucytosine*""[all fields] or ""foscarnet*""[all fields]<br/>             or ""ganciclovir*""[all fields] or ""isavuconazonium*""[all fields] or<br/>             ""isoconazole*""[all fields] or ""micafungin*""[all fields] or ""pentamidine*""[all<br/>             fields] or ""rifampin*""[all fields] or ""voriconazole*""[all fields] or ""anti infective<br/>             agents""[mesh terms] or (""anti infective agents""[pharmacological action] or<br/>             ""anti infective agents""[mesh terms] or (""anti infective""[all fields] and<br/>             ""agents""[all fields]) or ""anti infective agents""[all fields] or (""anti""[all fields]<br/>             and ""infective""[all fields]) or ""anti infective""[all fields] and<br/>             ""therapeutics""[mesh terms]) or (""antibiotic*""[all fields] or ""anti biotic*""[all<br/>             fields] or ""anti bacterial*""[all fields] or ""antibacterial*""[all fields] or<br/>             ""antimicrobial*""[all fields] or ""anti microbial*""[all fields] or ""anti fungal*""[all<br/>             fields] or ""anti viral*""[all fields] or ""antiviral*""[all fields] or (""infectious""[all<br/>             fields] or ""infectiousness""[all fields]) and ""agent*""[all fields]))" </p>                                                                                                                                                                                                                                                                                                                                                                                                                                                                                                                                                                                                                                                                                                                                                                                                                                                                                                                                                                                                                                                                                                                                                                                                                                                                                                                                                                                                                                                                                                                                                                                                                                                                                                                                                                                                                                                                                                                                                                                                                                                                                                                                                                                                                                                                                                                                                                                                                                                                                                                                                                                                                                                                                                                                                                                                                                                                                                                                                                                                                                                                                                                                                                                                                                                                                                                                                                                                                                                                                                                                                                                                                                                                                                                                                                                                                                                                                                                                                                                                                                                                                                                                                                                                                                                                                                                                                                                                                                                                                                                                                                                                                                                                                                                                                                                                                                                                                                                                                                                                                                                    |       |
| 12 | <p>             (((amikacin* or amoxicillin* or amoxycillin* or ampicillin* or azithromycin* or<br/>             aztreonam* or bleomycin* or carbenicillin* or cefazolin* or cefepime* or<br/>             cefiderocol* or cefmetazole* or cefonicid* or cefoperazone* or cefotaxime* or<br/>             cefotetan* or ceftazidime* or ceftazidimeavibactam* or ceftazidime-avibactam* or<br/>             ceftazidime-avibactam* or ceftizoxime* or ceftolozanetazobactam* or ceftolozane-<br/>             tazobactam* or ceftriaxone* or cefuroxime* or cephalothin* or cephapirin* or<br/>             chloramphenicol* or ciprofloxacin* or clarithromycin* or clindamycin* or<br/>             cloxacillin* or colistimethate* or dactinomycin* or daptomycin* or delafloxacin* or<br/>             doripenem* or eravacycline* or ertapenem* or erythromycin* or flucloxacillin* or<br/>             fosfomicin* or fusidic* or gentamicin* or imipenem* or imipenem-cilastatin-<br/>             relebactam* or kanamycin* or lefamulin* or levofloxacin* or lincomycin* or<br/>             linezolid* or meropenem* or meropenemvaborbactam* or methicillin* or<br/>             metronidazole* or mezlocillin* or mitomycin* or moxifloxacin* or nafcillin* or<br/>             netilmicin* or oritavancin* or oxacillin* or oxytetracycline* or penicillin* or<br/>             piperacillin* or piperacillin-tazobactam* or piperacillintazobactam* or<br/>             plazomicin* or plicamycin* or polymyxin* or quinupristin-dalfopristin* or<br/>             sulfamethoxazole* or sulfisoxazole* or teicoplanin* or telavancin* or temocillin* or<br/>             ticarcillin* or tigecycline* or tobramycin* or trovafloxacin* or vancomycin* or<br/>             aciclovir* or acyclovir* or amphotericin* or liposomal-amphotericin* or<br/>             ambisome* or anidulafungin* or caspofungin* or eravacycline* or famciclovir* or<br/>             fluconazole* or flucytosine* or foscarnet* or ganciclovir* or isavuconazonium* or<br/>             isoconazole* or micafungin* or pentamidine* or rifampin* or voriconazole*) or<br/>             (agents, antiinfective[mesh terms])) or (anti-infective therapy[mesh terms])) or<br/>             (antibiotic* or anti-biotic* or anti-bacterial* or antibacterial* or antimicrobial* or<br/>             anti-microbial* or anti-fungal* or anti-viral* or antiviral* or infectious agent*) and<br/>             ((((((drug delivery system[mesh terms]) or (elastomeric-pump* or balloon-pump*<br/>             or ball-pump* or portable pump* or accufuser* or lv10*)) or (external infusion<br/>             pump[mesh terms])) or (infusion pump[mesh terms])) or (elastomer[mesh<br/>             terms]))),most recent,,(""amikacin*""[all fields] or ""amoxicillin*""[all fields] or<br/>             ""amoxycillin*""[all fields] or ""ampicillin*""[all fields] or ""azithromycin*""[all<br/>             fields] or ""aztreonam*""[all fields] or ""bleomycin*""[all fields] or<br/>             ""carbenicillin*""[all fields] or ""cefazolin*""[all fields] or ""cefepime*""[all fields] or<br/>             ""cefiderocol*""[all fields] or ""cefmetazole*""[all fields] or ""cefonicid*""[all fields]<br/>             or ""cefoperazone*""[all fields] or ""cefotaxime*""[all fields] or ""cefotetan*""[all<br/>             fields] or ""ceftazidime*""[all fields] or ""ceftazidime-avibactam*""[all fields] or<br/>             ""ceftazidime-avibactam*""[all fields] or ""ceftizoxime*""[all fields] or ""ceftolozanetazobactam*""[all fields] or<br/>             ""ceftolozane-tazobactam*""[all fields] or ""ceftriaxone*""[all fields] or ""cefuroxime*""[all fields] or ""cephalothin*""[all fields] or<br/>             ""cephapirin*""[all fields] or ""chloramphenicol*""[all fields] or ""ciprofloxacin*""[all fields] or ""clarithromycin*""[all fields] or<br/>             ""clindamycin*""[all fields] or ""cloxacillin*""[all fields] or ""colistimethate*""[all fields] or ""dactinomycin*""[all fields] or<br/>             ""daptomycin*""[all fields] or ""delafloxacin*""[all fields] or ""doripenem*""[all fields] or ""eravacycline*""[all fields] or<br/>             ""ertapenem*""[all fields] or ""erythromycin*""[all fields] or ""flucloxacillin*""[all fields] or ""fosfomicin*""[all fields] or<br/>             ""fusidic*""[all fields] or ""gentamicin*""[all fields] or ""imipenem*""[all fields] or ""imipenem-cilastatin-relebactam*""[all fields] or<br/>             ""kanamycin*""[all fields] or ""lefamulin*""[all fields] or ""levofloxacin*""[all fields] or ""lincomycin*""[all fields] or<br/>             ""linezolid*""[all fields] or ""meropenem*""[all fields] or ""meropenemvaborbactam*""[all fields] or ""methicillin*""[all fields] or<br/>             ""metronidazole*""[all fields] or ""mezlocillin*""[all fields] or ""mitomycin*""[all fields] or ""moxifloxacin*""[all fields] or<br/>             ""nafcillin*""[all fields] or ""netilmicin*""[all fields] or ""oritavancin*""[all fields] or ""oxacillin*""[all fields] or<br/>             ""oxytetracycline*""[all fields] or ""penicillin*""[all fields] or ""piperacillin*""[all fields] or ""piperacillin-tazobactam*""[all fields] or<br/>             ""piperacillintazobactam*""[all fields] or ""plazomicin*""[all fields] or ""plicamycin*""[all fields] or ""polymyxin*""[all fields] or<br/>             ""quinupristin-dalfopristin*""[all fields] or ""sulfamethoxazole*""[all fields] or ""sulfisoxazole*""[all fields] or<br/>             ""teicoplanin*""[all fields] or ""telavancin*""[all fields] or ""temocillin*""[all fields] or ""ticarcillin*""[all fields] or<br/>             ""tigecycline*""[all fields] or ""tobramycin*""[all fields] or ""trovafloxacin*""[all fields] or ""vancomycin*""[all fields] or<br/>             ""aciclovir*""[all fields] or ""acyclovir*""[all fields] or ""amphotericin*""[all fields] or ""liposomal-amphotericin*""[all fields] or<br/>             ""ambisome*""[all fields] or ""anidulafungin*""[all fields] or ""caspofungin*""[all fields] or ""eravacycline*""[all fields] or<br/>             ""famciclovir*""[all fields] or ""fluconazole*""[all fields] or ""flucytosine*""[all fields] or ""foscarnet*""[all fields] or<br/>             ""ganciclovir*""[all fields] or ""isavuconazonium*""[all fields] or ""isoconazole*""[all fields] or ""micafungin*""[all fields] or<br/>             ""pentamidine*""[all fields] or ""rifampin*""[all fields] or ""voriconazole*""[all fields]) </p> | 35810 |

|    |                                                                                                                                                                                                                                                                                                                                                                                                                                                                                                                                                                                                                                                                                                                                                                                                                                                                                                                                                                                                                                                                                                                                                                                                                                                                                                                                                                                                                                                                                                                                                                                                                                                                                                                                                                                                                                                                                                                                                                                                                                                                                                                                                                                                                                                                                                                                                                                                                                                                                                                                                                                                                                                                                                                                                                                                                                                                                                                                                                                                                                                                                                                                                                                                                                                                                                                                                                                                                                                                                                                                                                                                                                                                                                                                                                                                                                                                                                                                                                                                                                                                                                                                                                                                                                                                                                                                                                                                                                                                                                                                                                                                                                                                    |        |
|----|--------------------------------------------------------------------------------------------------------------------------------------------------------------------------------------------------------------------------------------------------------------------------------------------------------------------------------------------------------------------------------------------------------------------------------------------------------------------------------------------------------------------------------------------------------------------------------------------------------------------------------------------------------------------------------------------------------------------------------------------------------------------------------------------------------------------------------------------------------------------------------------------------------------------------------------------------------------------------------------------------------------------------------------------------------------------------------------------------------------------------------------------------------------------------------------------------------------------------------------------------------------------------------------------------------------------------------------------------------------------------------------------------------------------------------------------------------------------------------------------------------------------------------------------------------------------------------------------------------------------------------------------------------------------------------------------------------------------------------------------------------------------------------------------------------------------------------------------------------------------------------------------------------------------------------------------------------------------------------------------------------------------------------------------------------------------------------------------------------------------------------------------------------------------------------------------------------------------------------------------------------------------------------------------------------------------------------------------------------------------------------------------------------------------------------------------------------------------------------------------------------------------------------------------------------------------------------------------------------------------------------------------------------------------------------------------------------------------------------------------------------------------------------------------------------------------------------------------------------------------------------------------------------------------------------------------------------------------------------------------------------------------------------------------------------------------------------------------------------------------------------------------------------------------------------------------------------------------------------------------------------------------------------------------------------------------------------------------------------------------------------------------------------------------------------------------------------------------------------------------------------------------------------------------------------------------------------------------------------------------------------------------------------------------------------------------------------------------------------------------------------------------------------------------------------------------------------------------------------------------------------------------------------------------------------------------------------------------------------------------------------------------------------------------------------------------------------------------------------------------------------------------------------------------------------------------------------------------------------------------------------------------------------------------------------------------------------------------------------------------------------------------------------------------------------------------------------------------------------------------------------------------------------------------------------------------------------------------------------------------------------------------------------------------|--------|
|    | <p>             ""ceftazidime*""[all fields] or ""ceftazidimeavibactam*""[all fields] or ""ceftazidime avibactam*""[all fields] or ""ceftizoxime*""[all fields] or<br/>             ""ceftolozanetazobactam*""[all fields] or ""ceftolozane tazobactam*""[all fields] or<br/>             ""ceftriaxone*""[all fields] or ""cefuroxime*""[all fields] or ""cephalothin*""[all fields] or ""cephapirin*""[all fields] or ""chloramphenicol*""[all fields] or<br/>             ""ciprofloxacin*""[all fields] or ""clarithromycin*""[all fields] or<br/>             ""clindamycin*""[all fields] or ""cloxacillin*""[all fields] or ""colistimethate*""[all fields] or ""dactinomycin*""[all fields] or ""daptomycin*""[all fields] or<br/>             ""delafloxacin*""[all fields] or ""doripenem*""[all fields] or ""eravacycline*""[all fields] or ""ertapenem*""[all fields] or ""erythromycin*""[all fields] or<br/>             ""flucloxacillin*""[all fields] or ""fosfomycin*""[all fields] or ""fusidic*""[all fields] or ""gentamicin*""[all fields] or ""imipenem*""[all fields] or ""imipenem cilastatin relebactam*""[all fields] or ""kanamycin*""[all fields] or ""lefamulin*""[all fields] or<br/>             ""levofloxacin*""[all fields] or ""lincomycin*""[all fields] or ""linezolid*""[all fields] or ""meropenem*""[all fields] or ""meropenemvaborbactam*""[all fields] or<br/>             ""methicillin*""[all fields] or ""metronidazole*""[all fields] or ""mezlocillin*""[all fields] or ""mitomycin*""[all fields] or ""moxifloxacin*""[all fields] or<br/>             ""nafcillin*""[all fields] or ""netilmicin*""[all fields] or ""oritavancin*""[all fields] or ""oxacillin*""[all fields] or ""oxytetracycline*""[all fields] or ""penicillin*""[all fields] or<br/>             ""piperacillin*""[all fields] or ""piperacillin tazobactam*""[all fields] or<br/>             ""piperacillintazobactam*""[all fields] or ""plazomicin*""[all fields] or<br/>             ""plicamycin*""[all fields] or ""polymyxin*""[all fields] or ""quinupristin dalfopristin*""[all fields] or ""sulfamethoxazole*""[all fields] or<br/>             ""sulfisoxazole*""[all fields] or ""teicoplanin*""[all fields] or ""telavancin*""[all fields] or ""temocillin*""[all fields] or ""ticarcillin*""[all fields] or ""tigecycline*""[all fields] or<br/>             ""tobramycin*""[all fields] or ""trovafloxacin*""[all fields] or<br/>             ""vancomycin*""[all fields] or ""acidovir*""[all fields] or ""acyclovir*""[all fields] or<br/>             ""amphotericin*""[all fields] or ""liposomal amphotericin*""[all fields] or<br/>             ""ambisome*""[all fields] or ""anidulafungin*""[all fields] or ""caspofungin*""[all fields] or ""eravacycline*""[all fields] or ""famciclovir*""[all fields] or<br/>             ""fluconazole*""[all fields] or ""flucytosine*""[all fields] or ""foscarnet*""[all fields] or<br/>             ""ganciclovir*""[all fields] or ""isavuconazonium*""[all fields] or<br/>             ""isoconazole*""[all fields] or ""micafungin*""[all fields] or ""pentamidine*""[all fields] or ""rifampin*""[all fields] or ""voriconazole*""[all fields] or ""anti infective agents""[mesh terms] or ((""anti infective agents""[pharmacological action] or<br/>             ""anti infective agents""[mesh terms] or (""anti infective""[all fields] and<br/>             ""agents""[all fields]) or ""anti infective agents""[all fields] or (""anti""[all fields] and<br/>             ""infective""[all fields]) or ""anti infective""[all fields]) and<br/>             ""therapeutics""[mesh terms]) or (""antibiotic*""[all fields] or ""anti biotic*""[all fields] or<br/>             ""anti bacterial*""[all fields] or ""antibacterial*""[all fields] or<br/>             ""antimicrobial*""[all fields] or ""anti microbial*""[all fields] or ""anti fungal*""[all fields] or<br/>             ""anti viral*""[all fields] or ""antiviral*""[all fields] or ((""infectious""[all fields] or<br/>             ""infectiousness""[all fields]) and ""agent*""[all fields])) and (""drug delivery systems""[mesh terms] or (""elastomeric pump*""[all fields] or ""balloon pump*""[all fields] or<br/>             ""ball pump*""[all fields] or ((""portability""[all fields] or ""portable""[all fields] or ""portables""[all fields]) and ""pump*""[all fields]) or<br/>             ""accufuser*""[all fields] or ""lv10*""[all fields]) or ""infusion pumps""[mesh terms] or<br/>             ""infusion pumps""[mesh terms] or ""elastomers""[mesh terms])" </p> |        |
| 13 | administration, intravenous[mesh terms]                                                                                                                                                                                                                                                                                                                                                                                                                                                                                                                                                                                                                                                                                                                                                                                                                                                                                                                                                                                                                                                                                                                                                                                                                                                                                                                                                                                                                                                                                                                                                                                                                                                                                                                                                                                                                                                                                                                                                                                                                                                                                                                                                                                                                                                                                                                                                                                                                                                                                                                                                                                                                                                                                                                                                                                                                                                                                                                                                                                                                                                                                                                                                                                                                                                                                                                                                                                                                                                                                                                                                                                                                                                                                                                                                                                                                                                                                                                                                                                                                                                                                                                                                                                                                                                                                                                                                                                                                                                                                                                                                                                                                            | 56867  |
| 14 | Intravenous* or parenteral* [all fields]                                                                                                                                                                                                                                                                                                                                                                                                                                                                                                                                                                                                                                                                                                                                                                                                                                                                                                                                                                                                                                                                                                                                                                                                                                                                                                                                                                                                                                                                                                                                                                                                                                                                                                                                                                                                                                                                                                                                                                                                                                                                                                                                                                                                                                                                                                                                                                                                                                                                                                                                                                                                                                                                                                                                                                                                                                                                                                                                                                                                                                                                                                                                                                                                                                                                                                                                                                                                                                                                                                                                                                                                                                                                                                                                                                                                                                                                                                                                                                                                                                                                                                                                                                                                                                                                                                                                                                                                                                                                                                                                                                                                                           | 554071 |

|    |                                                                                                                                                                                                                                                                                                                                                                                                                                                                                                                                                                                                                                                                                                                                                                                                                                                                                                                                                                                                                                                                                                                                                                                                                                                                                                                                                                                                                                                                                                                                                                                                                                                                                                                                                                                                                                                                                                                                                                                                                                                                                                                                                                                                                                                                                                                                                                                                                                                                                                                                                                                                                                                                                                                                                                                                                                                                                                                                                                                                                                                                                                                                                                                                                                                                                                                                                                                                                                                                                                                                                                                                                                                                                                                                                                                                                                                                     |        |
|----|---------------------------------------------------------------------------------------------------------------------------------------------------------------------------------------------------------------------------------------------------------------------------------------------------------------------------------------------------------------------------------------------------------------------------------------------------------------------------------------------------------------------------------------------------------------------------------------------------------------------------------------------------------------------------------------------------------------------------------------------------------------------------------------------------------------------------------------------------------------------------------------------------------------------------------------------------------------------------------------------------------------------------------------------------------------------------------------------------------------------------------------------------------------------------------------------------------------------------------------------------------------------------------------------------------------------------------------------------------------------------------------------------------------------------------------------------------------------------------------------------------------------------------------------------------------------------------------------------------------------------------------------------------------------------------------------------------------------------------------------------------------------------------------------------------------------------------------------------------------------------------------------------------------------------------------------------------------------------------------------------------------------------------------------------------------------------------------------------------------------------------------------------------------------------------------------------------------------------------------------------------------------------------------------------------------------------------------------------------------------------------------------------------------------------------------------------------------------------------------------------------------------------------------------------------------------------------------------------------------------------------------------------------------------------------------------------------------------------------------------------------------------------------------------------------------------------------------------------------------------------------------------------------------------------------------------------------------------------------------------------------------------------------------------------------------------------------------------------------------------------------------------------------------------------------------------------------------------------------------------------------------------------------------------------------------------------------------------------------------------------------------------------------------------------------------------------------------------------------------------------------------------------------------------------------------------------------------------------------------------------------------------------------------------------------------------------------------------------------------------------------------------------------------------------------------------------------------------------------------------|--------|
| 15 | (administration, intravenous[mesh terms]) or (intravenous* or parenteral*)",most recent,, ""infusions, intravenous""[mesh terms] or ""intravenous*""[all fields] or ""parenteral*""[all fields]"                                                                                                                                                                                                                                                                                                                                                                                                                                                                                                                                                                                                                                                                                                                                                                                                                                                                                                                                                                                                                                                                                                                                                                                                                                                                                                                                                                                                                                                                                                                                                                                                                                                                                                                                                                                                                                                                                                                                                                                                                                                                                                                                                                                                                                                                                                                                                                                                                                                                                                                                                                                                                                                                                                                                                                                                                                                                                                                                                                                                                                                                                                                                                                                                                                                                                                                                                                                                                                                                                                                                                                                                                                                                    | 554071 |
| 16 | "((((amikacin* or amoxicillin* or amoxycillin* or ampicillin* or azithromycin* or aztreonam* or bleomycin* or carbenicillin* or cefazolin* or cefepime* or cefiderocol* or cefmetazole* or cefonicid* or cefoperazone* or cefotaxime* or cefotetan* or ceftazidime* or ceftazidimeavibactam* or ceftazidime-avibactam* or ceftizoxime* or ceftolozanetazobactam* or ceftolozane-tazobactam* or ceftriaxone* or cefuroxime* or cephalothin* or cephalixin* or chloramphenicol* or ciprofloxacin* or clarithromycin* or clindamycin* or cloxacillin* or colistimethate* or dactinomycin* or daptomycin* or delafloxacin* or doripenem* or eravacycline* or ertapenem* or erythromycin* or flucloxacillin* or fosfomicin* or fusidic* or gentamicin* or imipenem* or imipenem-cilastatin-relebactam* or kanamycin* or lefamulin* or levofloxacin* or linezolid* or meropenem* or meropenemvaborbactam* or methicillin* or metronidazole* or mezlocillin* or mitomycin* or moxifloxacin* or nafcilin* or netilmicin* or oritavancin* or oxacillin* or oxytetracycline* or penicillin* or piperacillin* or piperacillin-tazobactam* or piperacillin-tazobactam* or plazomicin* or plicamycin* or polymyxin* or quinupristin-dalfopristin* or sulfamethoxazole* or sulfisoxazole* or teicoplanin* or telavancin* or temocillin* or ticarcillin* or tigecycline* or tobramycin* or trovafloxacin* or vancomycin* or aciclovir* or acyclovir* or amphotericin* or liposomal-amphotericin* or ambisome* or anidulafungin* or caspofungin* or eravacycline* or famciclovir* or fluconazole* or flucytosine* or foscarnet* or ganciclovir* or isavuconazonium* or isoconazole* or micafungin* or pentamidine* or rifampin* or voriconazole*) or (agents, anti-infective[mesh terms])) or (anti-infective therapy[mesh terms])) or (antibiotic* or anti-biotic* or anti-bacterial* or antibacterial* or antimicrobial* or anti-microbial* or anti-fungal* or anti-viral* or antiviral* or infectious agent*) and (((((drug delivery system[mesh terms]) or (elastomeric-pump* or balloon-pump* or ball-pump* or portable pump* or accufuser* or lv10*)) or (external infusion pump[mesh terms])) or (infusion pump[mesh terms])) or (elastomer[mesh terms])) and ((administration, intravenous[mesh terms]) or (intravenous* or parenteral*))",most recent,, ""amikacin*""[all fields] or ""amoxicillin*""[all fields] or ""amoxycillin*""[all fields] or ""ampicillin*""[all fields] or ""azithromycin*""[all fields] or ""aztreonam*""[all fields] or ""bleomycin*""[all fields] or ""carbenicillin*""[all fields] or ""cefazolin*""[all fields] or ""cefepime*""[all fields] or ""cefiderocol*""[all fields] or ""cefmetazole*""[all fields] or ""cefonicid*""[all fields] or ""cefoperazone*""[all fields] or ""cefotaxime*""[all fields] or ""cefotetan*""[all fields] or ""ceftazidime*""[all fields] or ""ceftazidimeavibactam*""[all fields] or ""ceftazidime avibactam*""[all fields] or ""ceftizoxime*""[all fields] or ""ceftolozanetazobactam*""[all fields] or ""ceftolozane tazobactam*""[all fields] or ""ceftriaxone*""[all fields] or ""cefuroxime*""[all fields] or ""cephalothin*""[all fields] or ""cephalexin*""[all fields] or ""chloramphenicol*""[all fields] or ""ciprofloxacin*""[all fields] or ""clarithromycin*""[all fields] or ""clindamycin*""[all fields] or ""cloxacillin*""[all fields] or ""colistimethate*""[all fields] or ""dactinomycin*""[all fields] or ""daptomycin*""[all fields] or ""delafloxacin*""[all fields] or ""doripenem*""[all fields] or ""eravacycline*""[all fields] or ""ertapenem*""[all fields] or ""erythromycin*""[all fields] or ""flucloxacillin*""[all fields] or ""fosfomicin*""[all fields] or ""fusidic*""[all fields] or ""gentamicin*""[all fields] or ""imipenem*""[all fields] or ""imipenem cilastatin | 2,311  |

|    |                                                                                                                                                                                                                                                                                                                                                                                                                                                                                                                                                                                                                                                                                                                                                                                                                                                                                                                                                                                                                                                                                                                                                                                                                                                                                                                                                                                                                                                                                                                                                                                                                                                                                                                                                                                                                                                                                                                                                                                                                                                                                                                                                                                                                                                                                                                                                                                                                                                                                                                                                                                                                                                                                                                                                                                                                                                                                                                                                                                                                                                                                                                                                                                                                                                    |     |
|----|----------------------------------------------------------------------------------------------------------------------------------------------------------------------------------------------------------------------------------------------------------------------------------------------------------------------------------------------------------------------------------------------------------------------------------------------------------------------------------------------------------------------------------------------------------------------------------------------------------------------------------------------------------------------------------------------------------------------------------------------------------------------------------------------------------------------------------------------------------------------------------------------------------------------------------------------------------------------------------------------------------------------------------------------------------------------------------------------------------------------------------------------------------------------------------------------------------------------------------------------------------------------------------------------------------------------------------------------------------------------------------------------------------------------------------------------------------------------------------------------------------------------------------------------------------------------------------------------------------------------------------------------------------------------------------------------------------------------------------------------------------------------------------------------------------------------------------------------------------------------------------------------------------------------------------------------------------------------------------------------------------------------------------------------------------------------------------------------------------------------------------------------------------------------------------------------------------------------------------------------------------------------------------------------------------------------------------------------------------------------------------------------------------------------------------------------------------------------------------------------------------------------------------------------------------------------------------------------------------------------------------------------------------------------------------------------------------------------------------------------------------------------------------------------------------------------------------------------------------------------------------------------------------------------------------------------------------------------------------------------------------------------------------------------------------------------------------------------------------------------------------------------------------------------------------------------------------------------------------------------------|-----|
|    | relebactam*"[all fields] or ""kanamycin*"[all fields] or ""lefamulin*"[all fields] or<br>""levofloxacin*"[all fields] or ""lincomycin*"[all fields] or ""linezolid*"[all fields]<br>or ""meropenem*"[all fields] or ""meropenemvaborbactam*"[all fields] or<br>""methicillin*"[all fields] or ""metronidazole*"[all fields] or ""mezlocillin*"[all<br>fields] or ""mitomycin*"[all fields] or ""moxifloxacin*"[all fields] or<br>""nafcillin*"[all fields] or ""netilmicin*"[all fields] or ""oritavancin*"[all fields] or<br>""oxacillin*"[all fields] or ""oxytetracycline*"[all fields] or ""penicillin*"[all fields]<br>or ""piperacillin*"[all fields] or ""piperacillin tazobactam*"[all fields] or<br>""piperacillintazobactam*"[all fields] or ""plazomicin*"[all fields] or<br>""plicamycin*"[all fields] or ""polymyxin*"[all fields] or ""quinupristin<br>dalfopristin*"[all fields] or ""sulfamethoxazole*"[all fields] or<br>""sulfisoxazole*"[all fields] or ""teicoplanin*"[all fields] or ""telavancin*"[all<br>fields] or ""temocillin*"[all fields] or ""ticarcillin*"[all fields] or ""tigecycline*"[all<br>fields] or ""tobramycin*"[all fields] or ""trovafloxacin*"[all fields] or<br>""vancomycin*"[all fields] or ""acidovir*"[all fields] or ""acyclovir*"[all fields] or<br>""amphotericin*"[all fields] or ""liposomal amphotericin*"[all fields] or<br>""ambisome*"[all fields] or ""anidulafungin*"[all fields] or ""caspofungin*"[all<br>fields] or ""eravacycline*"[all fields] or ""famciclovir*"[all fields] or<br>""fluconazole*"[all fields] or ""flucytosine*"[all fields] or ""foscarnet*"[all fields]<br>or ""ganciclovir*"[all fields] or ""isavuconazonium*"[all fields] or<br>""isoconazole*"[all fields] or ""micafungin*"[all fields] or ""pentamidine*"[all<br>fields] or ""rifampin*"[all fields] or ""voriconazole*"[all fields] or ""anti infective<br>agents""[mesh terms] or ((""anti infective agents""[pharmacological action] or<br>""anti infective agents""[mesh terms] or (""anti infective""[all fields] and<br>""agents""[all fields]) or ""anti infective agents""[all fields] or (""anti""[all fields]<br>and ""infective""[all fields]) or ""anti infective""[all fields]) and<br>""therapeutics""[mesh terms]) or (""antibiotic*"[all fields] or ""anti biotic*"[all<br>fields] or ""anti bacterial*"[all fields] or ""antibacterial*"[all fields] or<br>""antimicrobial*"[all fields] or ""anti microbial*"[all fields] or ""anti fungal*"[all<br>fields] or ""anti viral*"[all fields] or ""antiviral*"[all fields] or ((""infectious""[all<br>fields] or ""infectiousness""[all fields]) and ""agent*"[all fields])) and (""drug<br>delivery systems""[mesh terms] or (""elastomeric pump*"[all fields] or ""balloon<br>pump*"[all fields] or ""ball pump*"[all fields] or ((""portability""[all fields] or<br>""portable""[all fields] or ""portables""[all fields]) and ""pump*"[all fields]) or<br>""accufuser*"[all fields] or ""lv10*"[all fields]) or ""infusion pumps""[mesh terms]<br>or ""infusion pumps""[mesh terms] or ""elastomers""[mesh terms]) and<br>( ""infusions, intravenous""[mesh terms] or (""intravenous*"[all fields] or<br>""parenteral*"[all fields]))" |     |
| 17 | 16 limited to 2021-2022                                                                                                                                                                                                                                                                                                                                                                                                                                                                                                                                                                                                                                                                                                                                                                                                                                                                                                                                                                                                                                                                                                                                                                                                                                                                                                                                                                                                                                                                                                                                                                                                                                                                                                                                                                                                                                                                                                                                                                                                                                                                                                                                                                                                                                                                                                                                                                                                                                                                                                                                                                                                                                                                                                                                                                                                                                                                                                                                                                                                                                                                                                                                                                                                                            | 117 |

Table S7 – OPENGREY search strategy and results 21<sup>st</sup> November 2021

|   | Search Terms                                                                                                                                           | Hits   |
|---|--------------------------------------------------------------------------------------------------------------------------------------------------------|--------|
| 1 | Elastomeric pump* or balloon pump* or ball pump* or portable pump* or<br>accufuser* or lv10* or ntimate* or infuser*                                   | 70,935 |
| 2 | Antiinfective agent* or anti-infective* or infectious agent* or antibiotic*or<br>antifungal agent* or antiviral agent* or amikacin* or amoxicillin* or | 1,391  |

|   |                                                                                                                                                                                                                                                                                                                                                                                                                                                                                                                                                                                                                                                                                                                                                                                                                                                                                                                                                                                                                                                                                                                                                                                                                                                                                                                                                                                                                                                                                                                                                                                                                                                                                                            |       |
|---|------------------------------------------------------------------------------------------------------------------------------------------------------------------------------------------------------------------------------------------------------------------------------------------------------------------------------------------------------------------------------------------------------------------------------------------------------------------------------------------------------------------------------------------------------------------------------------------------------------------------------------------------------------------------------------------------------------------------------------------------------------------------------------------------------------------------------------------------------------------------------------------------------------------------------------------------------------------------------------------------------------------------------------------------------------------------------------------------------------------------------------------------------------------------------------------------------------------------------------------------------------------------------------------------------------------------------------------------------------------------------------------------------------------------------------------------------------------------------------------------------------------------------------------------------------------------------------------------------------------------------------------------------------------------------------------------------------|-------|
|   | amoxycillin* or ampicillin* or azithromycin* or aztreonam* or bleomycin* or carbenicillin* or cefazolin* or cefepimecefiderocol* or cefmetazole* or cefonicid* or cefoperazone* or cefotaxime* or cefotetan* or cefoxitin* or ceftaroline* or ceftazidime* or ceftazidimeavibactam*ceftazidime-avibactam* or ceftizoxime* or ceftolozanetazobactam* or ceftolozane-tazobactam* or ceftriaxone* or cefuroxime* or cephalothin* or cephalixin* or chloramphenicol* or ciprofloxacin*clarithromycin* or clindamycin* or cloxacillin* or colistimethate* or dactinomycin* or daptomycin* or delafloxacin* or doripenem* or eravacycline* or ertapenem*erythromycin* or flucloxacillin* or fosfomycin* or fusidic* or gentamicin* or imipenem* or imipenem-cilastatin-relebactam* or kanamycin* or lefamulin* or levofloxacin* or lincomycin* or linezolid* or meropenem* or meropenemvaborbactam* or methicillin* or metronidazole* or mezlocillin* or mitomycin* or moxifloxacin* or nafcillin*netilmicin* or oritavancin* or oxacillin* or oxytetracycline* or penicillin* or piperacillin* or piperacillin-tazobactam* or piperacillintazobactam* or plazomicin* or plicamycin* or polymyxin*quinupristin-dalfopristin* or sulfamethoxazole* or sulfisoxazole* or teicoplanin* or telavancin* or temocillin* or ticarcillin* or tigecycline* or tobramycin* or trovafloxacin* or vancomycin*aciclovir* or acyclovir* or amphotericin* or liposomal-amphotericin* or ambisome* or anidulafungin* or caspofungin* or eravacycline* or famciclovir* or fluconazole*flucytosine* or foscarnet* or ganciclovir* or isavuconazonium* or isoconazole* or micafungin* or pentamidine* or rifampin* or voriconazole* |       |
| 3 | 1 or 2                                                                                                                                                                                                                                                                                                                                                                                                                                                                                                                                                                                                                                                                                                                                                                                                                                                                                                                                                                                                                                                                                                                                                                                                                                                                                                                                                                                                                                                                                                                                                                                                                                                                                                     | 72337 |
| 4 | 3 and intravenous* or parenteral* or continuous*                                                                                                                                                                                                                                                                                                                                                                                                                                                                                                                                                                                                                                                                                                                                                                                                                                                                                                                                                                                                                                                                                                                                                                                                                                                                                                                                                                                                                                                                                                                                                                                                                                                           | 46    |

Table S8 – Google scholar search strategy and results 22<sup>nd</sup> December 2022

|   | Search Terns                             | Hits                          |
|---|------------------------------------------|-------------------------------|
| 1 | Elastomeric infusion pumps antimicrobial | 2,130<br>(first 200 included) |

Table S9 – BIOSIS search strategy and results 20<sup>th</sup> January 2023

|   | Search Terms                                                                                                                                                                                                                                                                                                                                                                                                                                                                                                                                                                                                                                                                                                                                                                                                                                                                                                                                                                                                                                                                                                                                          | Hits    |
|---|-------------------------------------------------------------------------------------------------------------------------------------------------------------------------------------------------------------------------------------------------------------------------------------------------------------------------------------------------------------------------------------------------------------------------------------------------------------------------------------------------------------------------------------------------------------------------------------------------------------------------------------------------------------------------------------------------------------------------------------------------------------------------------------------------------------------------------------------------------------------------------------------------------------------------------------------------------------------------------------------------------------------------------------------------------------------------------------------------------------------------------------------------------|---------|
| 1 | Ts=(elastomeric pump* or balloon pump* or ball pump* or portable pump* or accufuser* or lv10* or ntimate* or infuser* )                                                                                                                                                                                                                                                                                                                                                                                                                                                                                                                                                                                                                                                                                                                                                                                                                                                                                                                                                                                                                               | 6,646   |
| 2 | Ts=(amikacin* or amoxicillin* or amoxycillin* or ampicillin* or azithromycin* or aztreonam* or bleomycin* or carbenicillin* or cefazolin* or cefepimecefiderocol* or cefmetazole* or cefonicid* or cefoperazone* or cefotaxime* or cefotetan* or cefoxitin* or ceftaroline* or ceftazidime* or ceftazidimeavibactam*ceftazidime-avibactam* or ceftizoxime* or ceftolozanetazobactam* or ceftolozane-tazobactam* or ceftriaxone* or cefuroxime* or cephalothin* or cephalixin* or chloramphenicol* or ciprofloxacin*clarithromycin* or clindamycin* or cloxacillin* or colistimethate* or dactinomycin* or daptomycin* or delafloxacin* or doripenem* or eravacycline* or ertapenem*erythromycin* or flucloxacillin* or fosfomycin* or fusidic* or gentamicin* or imipenem* or imipenem-cilastatin-relebactam* or kanamycin* or lefamulin* or levofloxacin*lincomycin* or linezolid* or meropenem* or meropenemvaborbactam* or methicillin* or metronidazole* or mezlocillin* or mitomycin* or moxifloxacin* or nafcillin*netilmicin* or oritavancin* or oxacillin* or oxytetracycline* or penicillin* or piperacillin* or piperacillin-tazobactam* or | 378,152 |

|   |                                                                                                                                                                                                                                                                                                                                                                                                                                                                                                                                                                                    |         |
|---|------------------------------------------------------------------------------------------------------------------------------------------------------------------------------------------------------------------------------------------------------------------------------------------------------------------------------------------------------------------------------------------------------------------------------------------------------------------------------------------------------------------------------------------------------------------------------------|---------|
|   | piperacillintazobactam* or plazomicin* or plicamycin* or polymyxin*quinupristin-dalfopristin* or sulfamethoxazole* or sulfisoxazole* or teicoplanin* or telavancin* or temocillin* or ticarcillin* or tigecycline* or tobramycin* or trovafloxacin* or vancomycin*aciclovir* or acyclovir* or amphotericin* or liposomal-amphotericin* or ambisome* or anidulafungin* or caspofungin* or eravacycline* or famciclovir* or fluconazole*flucytosine* or foscarnet* or ganciclovir* or isavuconazonium* or isoconazole* or micafungin* or pentamidine* or rifampin* or voriconazole*) |         |
| 3 | Ts=(antiinfective agent* or anti-infective* or infectious agent* or antibiotic*or antifungal agent* or antiviral agent)                                                                                                                                                                                                                                                                                                                                                                                                                                                            | 536,581 |
| 4 | 3 or 2                                                                                                                                                                                                                                                                                                                                                                                                                                                                                                                                                                             | 767,434 |
| 5 | 1 and 4                                                                                                                                                                                                                                                                                                                                                                                                                                                                                                                                                                            | 112     |
| 6 | 5 between 21 Nov 2021 and 20 Jan 2023                                                                                                                                                                                                                                                                                                                                                                                                                                                                                                                                              | 5       |

Table S10 – Web of Science (WOS) search strategy and results 20<sup>th</sup> Jan 2023

|   | Search Terms                                                                                                                                                                                                                                                                                                                                                                                                                                                                                                                                                                                                                                                                                                                                                                                                                                                         | Hits    |
|---|----------------------------------------------------------------------------------------------------------------------------------------------------------------------------------------------------------------------------------------------------------------------------------------------------------------------------------------------------------------------------------------------------------------------------------------------------------------------------------------------------------------------------------------------------------------------------------------------------------------------------------------------------------------------------------------------------------------------------------------------------------------------------------------------------------------------------------------------------------------------|---------|
| 1 | All=(elastomeric infusion pump* or infusion pump* elastomeric pump* or balloon pump* or ball pump* or portable pump* or accufuser* or lv10* or intimate* or infusor* )                                                                                                                                                                                                                                                                                                                                                                                                                                                                                                                                                                                                                                                                                               | 93,421  |
| 2 | All=(antiinfective agent* or anti-infective* or infectious agent* or antibiotic*or antifungal agent* or antiviral agent*)                                                                                                                                                                                                                                                                                                                                                                                                                                                                                                                                                                                                                                                                                                                                            | 122,322 |
| 3 | All=(amikacin* or amoxicillin* or amoxycillin* or ampicillin* or azithromycin* or aztreonam* or bleomycin* or carbenicillin* or cefazolin* or cefepimecefiderocol* or cefmetazole* or cefonicid* or cefoperazone* or cefotaxime* or cefotetan* or ceftazidime* or ceftazidimeavibactam*ceftazidime-avibactam* or ceftizoxime* or ceftolozanetazobactam* or ceftolozane-tazobactam* or ceftriaxone* or cefuroxime* or cephalothin* or cephradine* or chloramphenicol* or ciprofloxacin*clarithromycin* or clindamycin* or cloxacillin* or colistimethate* or dactinomycin* or daptomycin* or delafloxacin* or doripenem* or eravacycline* or ertapenem*erythromycin* or flucloxacillin* or fosfomycin* or fusidic* or gentamicin* or imipenem* or imipenem-cilastatin-relebactam* or kanamycin* or lefamulin* or levofloxacin* or lincomycin*)                        | 200,685 |
| 4 | All=(linezolid* or meropenem* or meropenemvaborbactam* or methicillin* or metronidazole* or mezlocillin* or mitomycin* or moxifloxacin* or nafcillin*netilmicin* or oritavancin* or oxacillin* or oxytetracycline* or penicillin* or piperacillin* or piperacillin-tazobactam* or piperacillintazobactam* or plazomicin* or plicamycin* or polymyxin*quinupristin-dalfopristin* or sulfamethoxazole* or sulfisoxazole* or teicoplanin* or telavancin* or temocillin* or ticarcillin* or tigecycline* or tobramycin* or trovafloxacin* or vancomycin*aciclovir* or acyclovir* or amphotericin* or liposomal-amphotericin* or ambisome* or anidulafungin* or caspofungin* or eravacycline* or famciclovir* or fluconazole*flucytosine* or foscarnet* or ganciclovir* or isavuconazonium* or isoconazole* or micafungin* or pentamidine* or rifampin* or voriconazole*) | 269,291 |
| 5 | 3 or 4                                                                                                                                                                                                                                                                                                                                                                                                                                                                                                                                                                                                                                                                                                                                                                                                                                                               | 412,884 |
| 6 | 1 and 2                                                                                                                                                                                                                                                                                                                                                                                                                                                                                                                                                                                                                                                                                                                                                                                                                                                              | 156     |



|    |                                       |     |
|----|---------------------------------------|-----|
| 7  | 1 and 3                               | 143 |
| 8  | 1 and 4                               | 179 |
| 9  | 6 or 7                                | 290 |
| 10 | 9 between 21 Nov 2021 and 20 Jan 2023 | 18  |

Table S11 – Google search strategy and results 5<sup>th</sup> February 2023

|   | Search Terms                               | Hits                             |
|---|--------------------------------------------|----------------------------------|
| 1 | Elastomeric pump antimicrobial intravenous | 49700000<br>(first 100 included) |

Table S12 – PRIMSA Checklist

| Section and Topic             | Item # | Checklist item                                                                                                                                                                                                                                                                                       | Location where item is reported                 |
|-------------------------------|--------|------------------------------------------------------------------------------------------------------------------------------------------------------------------------------------------------------------------------------------------------------------------------------------------------------|-------------------------------------------------|
| <b>TITLE</b>                  |        |                                                                                                                                                                                                                                                                                                      |                                                 |
| Title                         | 1      | Identify the report as a systematic review.                                                                                                                                                                                                                                                          | Page 1                                          |
| <b>ABSTRACT</b>               |        |                                                                                                                                                                                                                                                                                                      |                                                 |
| Abstract                      | 2      | See the PRISMA 2020 for Abstracts checklist.                                                                                                                                                                                                                                                         |                                                 |
| <b>INTRODUCTION</b>           |        |                                                                                                                                                                                                                                                                                                      |                                                 |
| Rationale                     | 3      | Describe the rationale for the review in the context of existing knowledge.                                                                                                                                                                                                                          | Page 1                                          |
| Objectives                    | 4      | Provide an explicit statement of the objective(s) or question(s) the review addresses.                                                                                                                                                                                                               | Page 1                                          |
| <b>METHODS</b>                |        |                                                                                                                                                                                                                                                                                                      |                                                 |
| Eligibility criteria          | 5      | Specify the inclusion and exclusion criteria for the review and how studies were grouped for the syntheses.                                                                                                                                                                                          | Page 4                                          |
| Information sources           | 6      | Specify all databases, registers, websites, organisations, reference lists and other sources searched or consulted to identify studies. Specify the date when each source was last searched or consulted.                                                                                            | Page 4 / Appendix A1/ supplementary information |
| Search strategy               | 7      | Present the full search strategies for all databases, registers and websites, including any filters and limits used.                                                                                                                                                                                 | Appendix A1                                     |
| Selection process             | 8      | Specify the methods used to decide whether a study met the inclusion criteria of the review, including how many reviewers screened each record and each report retrieved, whether they worked independently, and if applicable, details of automation tools used in the process.                     | Page 4 / Appendix A1                            |
| Data collection process       | 9      | Specify the methods used to collect data from reports, including how many reviewers collected data from each report, whether they worked independently, any processes for obtaining or confirming data from study investigators, and if applicable, details of automation tools used in the process. | Page 4                                          |
| Data items                    | 10a    | List and define all outcomes for which data were sought. Specify whether all results that were compatible with each outcome domain in each study were sought (e.g. for all measures, time points, analyses), and if not, the methods used to decide which results to collect.                        | Page 4 / supplementary materials                |
|                               | 10b    | List and define all other variables for which data were sought (e.g. participant and intervention characteristics, funding sources). Describe any assumptions made about any missing or unclear information.                                                                                         | Page 4 / supplementary materials                |
| Study risk of bias assessment | 11     | Specify the methods used to assess risk of bias in the included studies, including details of the tool(s) used, how many reviewers assessed each study and whether they worked independently, and if applicable, details of automation tools used in the process.                                    | Page 4 / Appendix B                             |
| Effect measures               | 12     | Specify for each outcome the effect measure(s) (e.g. risk ratio, mean difference) used in the synthesis or presentation of results.                                                                                                                                                                  | Page 4 / Supplementary materials                |

| Section and Topic             | Item # | Checklist item                                                                                                                                                                                                                                                                       | Location where item is reported                   |
|-------------------------------|--------|--------------------------------------------------------------------------------------------------------------------------------------------------------------------------------------------------------------------------------------------------------------------------------------|---------------------------------------------------|
| Synthesis methods             | 13a    | Describe the processes used to decide which studies were eligible for each synthesis (e.g. tabulating the study intervention characteristics and comparing against the planned groups for each synthesis (item #5)).                                                                 | Page 4 / Supplementary materials                  |
|                               | 13b    | Describe any methods required to prepare the data for presentation or synthesis, such as handling of missing summary statistics, or data conversions.                                                                                                                                | Page 4 / Supplementary materials                  |
|                               | 13c    | Describe any methods used to tabulate or visually display results of individual studies and syntheses.                                                                                                                                                                               | Page 4                                            |
|                               | 13d    | Describe any methods used to synthesize results and provide a rationale for the choice(s). If meta-analysis was performed, describe the model(s), method(s) to identify the presence and extent of statistical heterogeneity, and software package(s) used.                          | Page 4                                            |
|                               | 13e    | Describe any methods used to explore possible causes of heterogeneity among study results (e.g. subgroup analysis, meta-regression).                                                                                                                                                 | Page 4                                            |
|                               | 13f    | Describe any sensitivity analyses conducted to assess robustness of the synthesized results.                                                                                                                                                                                         | Page 4                                            |
| Reporting bias assessment     | 14     | Describe any methods used to assess risk of bias due to missing results in a synthesis (arising from reporting biases).                                                                                                                                                              | Page 4 / Appendix B                               |
| Certainty assessment          | 15     | Describe any methods used to assess certainty (or confidence) in the body of evidence for an outcome.                                                                                                                                                                                | Page 3                                            |
| <b>RESULTS</b>                |        |                                                                                                                                                                                                                                                                                      |                                                   |
| Study selection               | 16a    | Describe the results of the search and selection process, from the number of records identified in the search to the number of studies included in the review, ideally using a flow diagram.                                                                                         | Page 3                                            |
|                               | 16b    | Cite studies that might appear to meet the inclusion criteria, but which were excluded, and explain why they were excluded.                                                                                                                                                          | Page 3                                            |
| Study characteristics         | 17     | Cite each included study and present its characteristics.                                                                                                                                                                                                                            | Page 3                                            |
| Risk of bias in studies       | 18     | Present assessments of risk of bias for each included study.                                                                                                                                                                                                                         | Page 3                                            |
| Results of individual studies | 19     | For all outcomes, present, for each study: (a) summary statistics for each group (where appropriate) and (b) an effect estimate and its precision (e.g. confidence/credible interval), ideally using structured tables or plots.                                                     | Supplementary materials – data synthesis / Page 3 |
| Results of syntheses          | 20a    | For each synthesis, briefly summarise the characteristics and risk of bias among contributing studies.                                                                                                                                                                               | Page 3                                            |
|                               | 20b    | Present results of all statistical syntheses conducted. If meta-analysis was done, present for each the summary estimate and its precision (e.g. confidence/credible interval) and measures of statistical heterogeneity. If comparing groups, describe the direction of the effect. | Supplementary materials – data synthesis / Page 3 |
|                               | 20c    | Present results of all investigations of possible causes of heterogeneity among study results.                                                                                                                                                                                       | N                                                 |

| Section and Topic                              | Item # | Checklist item                                                                                                                                                                                                                             | Location where item is reported                       |
|------------------------------------------------|--------|--------------------------------------------------------------------------------------------------------------------------------------------------------------------------------------------------------------------------------------------|-------------------------------------------------------|
|                                                | 20d    | Present results of all sensitivity analyses conducted to assess the robustness of the synthesized results.                                                                                                                                 | N                                                     |
| Reporting biases                               | 21     | Present assessments of risk of bias due to missing results (arising from reporting biases) for each synthesis assessed.                                                                                                                    | Supplementary materials – data synthesis / Appendix B |
| Certainty of evidence                          | 22     | Present assessments of certainty (or confidence) in the body of evidence for each outcome assessed.                                                                                                                                        | Page 3                                                |
| <b>DISCUSSION</b>                              |        |                                                                                                                                                                                                                                            |                                                       |
| Discussion                                     | 23a    | Provide a general interpretation of the results in the context of other evidence.                                                                                                                                                          | Page 3                                                |
|                                                | 23b    | Discuss any limitations of the evidence included in the review.                                                                                                                                                                            | Page 3                                                |
|                                                | 23c    | Discuss any limitations of the review processes used.                                                                                                                                                                                      | Page 3                                                |
|                                                | 23d    | Discuss implications of the results for practice, policy, and future research.                                                                                                                                                             | Page 3                                                |
| <b>OTHER INFORMATION</b>                       |        |                                                                                                                                                                                                                                            |                                                       |
| Registration and protocol                      | 24a    | Provide registration information for the review, including register name and registration number, or state that the review was not registered.                                                                                             | Page 3                                                |
|                                                | 24b    | Indicate where the review protocol can be accessed, or state that a protocol was not prepared.                                                                                                                                             | Page 3                                                |
|                                                | 24c    | Describe and explain any amendments to information provided at registration or in the protocol.                                                                                                                                            | Page 4                                                |
| Support                                        | 25     | Describe sources of financial or non-financial support for the review, and the role of the funders or sponsors in the review.                                                                                                              | Page 5                                                |
| Competing interests                            | 26     | Declare any competing interests of review authors.                                                                                                                                                                                         | Page 5                                                |
| Availability of data, code and other materials | 27     | Report which of the following are publicly available and where they can be found: template data collection forms; data extracted from included studies; data used for all analyses; analytic code; any other materials used in the review. | Y                                                     |

From: Page MJ, McKenzie JE, Bossuyt PM, Boutron I, Hoffmann TC, Mulrow CD, et al. The PRISMA 2020 statement: an updated guideline for reporting systematic reviews. BMJ 2021;372:n71. doi: 10.1136/bmj.n71

For more information, visit: <http://www.prisma-statement.org/>

Table S13 – Systematic review without meta-analysis (SWiM) Checklist

| SWiM reporting item                                                | Item description                                                                                                                                                                                                                                                                                           | Page in manuscript where item is reported |
|--------------------------------------------------------------------|------------------------------------------------------------------------------------------------------------------------------------------------------------------------------------------------------------------------------------------------------------------------------------------------------------|-------------------------------------------|
| 1 Grouping studies for synthesis                                   | 1a) Provide a description of, and rationale for, the groups used in the synthesis (eg, groupings of populations, interventions, outcomes, study design)                                                                                                                                                    | Page 2                                    |
|                                                                    | 1b) Detail and provide rationale for any changes made subsequent to the protocol in the groups used in the synthesis                                                                                                                                                                                       | Page 4                                    |
| 2 Describe the standardised metric and transformation methods used | Describe the standardised metric for each outcome. Explain why the metric(s) was chosen and describe any methods used to transform the intervention effects, as reported in the study, to the standardised metric, citing any methodological guidance consulted                                            | Page 2                                    |
| 3 Describe the synthesis methods                                   | Describe and justify the methods used to synthesise the effects for each outcome when it was not possible to undertake a meta-analysis of effect estimates                                                                                                                                                 | Page 2                                    |
| 4 Criteria used to prioritise results for summary and synthesis    | Where applicable, provide the criteria used, with supporting justification, to select the particular studies, or a particular study, for the main synthesis or to draw conclusions from the synthesis (eg, based on study design, risk of bias assessments, directness in relation to the review question) | Page 2 / Page 3                           |
| 5 Investigation of heterogeneity in reported effects               | State the method(s) used to examine heterogeneity in reported effects when it was not possible to undertake a meta-analysis of effect estimates and its extensions to investigate heterogeneity                                                                                                            | Page 2                                    |
| 6 Certainty of evidence                                            | Describe the methods used to assess the certainty of the synthesis findings                                                                                                                                                                                                                                | Page 3                                    |
| 7 Data presentation methods                                        | Describe the graphical and tabular methods used to present the effects (eg, tables, forest plots, harvest plots)                                                                                                                                                                                           | Page 2 and supplementary materials        |
|                                                                    | Specify key study characteristics (eg, study design, risk of bias) used to order the studies, in the text and any tables or graphs, clearly referencing the studies included                                                                                                                               |                                           |
| 8 Reporting results                                                | For each comparison and outcome, provide a description of the synthesised findings and the certainty of the findings. Describe the result in language that is consistent with the question the synthesis addresses, and indicate which studies contribute to the synthesis                                 | Page 2 and supplementary materials        |
| 9 Limitations of the synthesis                                     | Report the limitations of the synthesis methods used and/or the groupings used in the synthesis and how these affect the conclusions that can be drawn in relation to the original review question                                                                                                         | Page 3                                    |
